# Supplementary material
Source: publisher site journal article supplement (https://www.spandidos-publications.com/685/downloadSupplementary)
Supplement: Supplementary file 1 [file downloadSupplementary]

## Sheet: query2map
KEGG pathway analysis OXA-treated MKN-45 cells protein functions query2map.
Protein_ID	KO	Name	Definition	Map_ID	Map_Name	URL
A0A024R7S3	K04645	CLTB, LCB	clathrin light chain B	map04142	Lysosome	http://www.kegg.jp/kegg-bin/show_pathway?map04142+K04645
A0A024R7S3	K04645	CLTB, LCB	clathrin light chain B	map04144	Endocytosis	http://www.kegg.jp/kegg-bin/show_pathway?map04144+K04645
A0A024R7S3	K04645	CLTB, LCB	clathrin light chain B	map04721	Synaptic vesicle cycle	http://www.kegg.jp/kegg-bin/show_pathway?map04721+K04645
A0A024R7S3	K04645	CLTB, LCB	clathrin light chain B	map04961	Endocrine and other factor-regulated calcium reabsorption	http://www.kegg.jp/kegg-bin/show_pathway?map04961+K04645
A0A024R7S3	K04645	CLTB, LCB	clathrin light chain B	map05016	Huntington's disease	http://www.kegg.jp/kegg-bin/show_pathway?map05016+K04645
A0A024R7S3	K04645	CLTB, LCB	clathrin light chain B	map05100	Bacterial invasion of epithelial cells	http://www.kegg.jp/kegg-bin/show_pathway?map05100+K04645
O43678	K03946	NDUFA2	NADH dehydrogenase (ubiquinone) 1 alpha subcomplex subunit 2	map00190	Oxidative phosphorylation	http://www.kegg.jp/kegg-bin/show_pathway?map00190+K03946
O43678	K03946	NDUFA2	NADH dehydrogenase (ubiquinone) 1 alpha subcomplex subunit 2	map04932	Non-alcoholic fatty liver disease (NAFLD)	http://www.kegg.jp/kegg-bin/show_pathway?map04932+K03946
O43678	K03946	NDUFA2	NADH dehydrogenase (ubiquinone) 1 alpha subcomplex subunit 2	map05010	Alzheimer's disease	http://www.kegg.jp/kegg-bin/show_pathway?map05010+K03946
O43678	K03946	NDUFA2	NADH dehydrogenase (ubiquinone) 1 alpha subcomplex subunit 2	map05012	Parkinson's disease	http://www.kegg.jp/kegg-bin/show_pathway?map05012+K03946
O43678	K03946	NDUFA2	NADH dehydrogenase (ubiquinone) 1 alpha subcomplex subunit 2	map05016	Huntington's disease	http://www.kegg.jp/kegg-bin/show_pathway?map05016+K03946
B6CGU5	K04398	CASP8	caspase 8 [EC:3.4.22.61;]	map01524	Platinum drug resistance	http://www.kegg.jp/kegg-bin/show_pathway?map01524+K04398
B6CGU5	K04398	CASP8	caspase 8 [EC:3.4.22.61;]	map04115	p53 signaling pathway	http://www.kegg.jp/kegg-bin/show_pathway?map04115+K04398
B6CGU5	K04398	CASP8	caspase 8 [EC:3.4.22.61;]	map04210	Apoptosis	http://www.kegg.jp/kegg-bin/show_pathway?map04210+K04398
B6CGU5	K04398	CASP8	caspase 8 [EC:3.4.22.61;]	map04214	Apoptosis - fly	http://www.kegg.jp/kegg-bin/show_pathway?map04214+K04398
B6CGU5	K04398	CASP8	caspase 8 [EC:3.4.22.61;]	map04215	Apoptosis - multiple species	http://www.kegg.jp/kegg-bin/show_pathway?map04215+K04398
B6CGU5	K04398	CASP8	caspase 8 [EC:3.4.22.61;]	map04620	Toll-like receptor signaling pathway	http://www.kegg.jp/kegg-bin/show_pathway?map04620+K04398
B6CGU5	K04398	CASP8	caspase 8 [EC:3.4.22.61;]	map04621	NOD-like receptor signaling pathway	http://www.kegg.jp/kegg-bin/show_pathway?map04621+K04398
B6CGU5	K04398	CASP8	caspase 8 [EC:3.4.22.61;]	map04622	RIG-I-like receptor signaling pathway	http://www.kegg.jp/kegg-bin/show_pathway?map04622+K04398
B6CGU5	K04398	CASP8	caspase 8 [EC:3.4.22.61;]	map04624	Toll and Imd signaling pathway	http://www.kegg.jp/kegg-bin/show_pathway?map04624+K04398
B6CGU5	K04398	CASP8	caspase 8 [EC:3.4.22.61;]	map04668	TNF signaling pathway	http://www.kegg.jp/kegg-bin/show_pathway?map04668+K04398
B6CGU5	K04398	CASP8	caspase 8 [EC:3.4.22.61;]	map04932	Non-alcoholic fatty liver disease (NAFLD)	http://www.kegg.jp/kegg-bin/show_pathway?map04932+K04398
B6CGU5	K04398	CASP8	caspase 8 [EC:3.4.22.61;]	map05010	Alzheimer's disease	http://www.kegg.jp/kegg-bin/show_pathway?map05010+K04398
B6CGU5	K04398	CASP8	caspase 8 [EC:3.4.22.61;]	map05016	Huntington's disease	http://www.kegg.jp/kegg-bin/show_pathway?map05016+K04398
B6CGU5	K04398	CASP8	caspase 8 [EC:3.4.22.61;]	map05134	Legionellosis	http://www.kegg.jp/kegg-bin/show_pathway?map05134+K04398
B6CGU5	K04398	CASP8	caspase 8 [EC:3.4.22.61;]	map05142	Chagas disease (American trypanosomiasis)	http://www.kegg.jp/kegg-bin/show_pathway?map05142+K04398
B6CGU5	K04398	CASP8	caspase 8 [EC:3.4.22.61;]	map05145	Toxoplasmosis	http://www.kegg.jp/kegg-bin/show_pathway?map05145+K04398
B6CGU5	K04398	CASP8	caspase 8 [EC:3.4.22.61;]	map05152	Tuberculosis	http://www.kegg.jp/kegg-bin/show_pathway?map05152+K04398
B6CGU5	K04398	CASP8	caspase 8 [EC:3.4.22.61;]	map05161	Hepatitis B	http://www.kegg.jp/kegg-bin/show_pathway?map05161+K04398
B6CGU5	K04398	CASP8	caspase 8 [EC:3.4.22.61;]	map05168	Herpes simplex infection	http://www.kegg.jp/kegg-bin/show_pathway?map05168+K04398
B6CGU5	K04398	CASP8	caspase 8 [EC:3.4.22.61;]	map05200	Pathways in cancer	http://www.kegg.jp/kegg-bin/show_pathway?map05200+K04398
B6CGU5	K04398	CASP8	caspase 8 [EC:3.4.22.61;]	map05203	Viral carcinogenesis	http://www.kegg.jp/kegg-bin/show_pathway?map05203+K04398
B6CGU5	K04398	CASP8	caspase 8 [EC:3.4.22.61;]	map05416	Viral myocarditis	http://www.kegg.jp/kegg-bin/show_pathway?map05416+K04398
B1ALI9	K20910	TXNIP	thioredoxin-interacting protein	map04621	NOD-like receptor signaling pathway	http://www.kegg.jp/kegg-bin/show_pathway?map04621+K20910
Q6IAM0	K03248	EIF3G	translation initiation factor 3 subunit G	map03013	RNA transport	http://www.kegg.jp/kegg-bin/show_pathway?map03013+K03248
F1JVV5	K09053	ATF1	activating transcription factor 1	map04925	Aldosterone synthesis and secretion	http://www.kegg.jp/kegg-bin/show_pathway?map04925+K09053
F1JVV5	K09053	ATF1	activating transcription factor 1	map05166	HTLV-I infection	http://www.kegg.jp/kegg-bin/show_pathway?map05166+K09053
F1JVV5	K09053	ATF1	activating transcription factor 1	map05202	Transcriptional misregulation in cancer	http://www.kegg.jp/kegg-bin/show_pathway?map05202+K09053
Q9Y6A5	K14283	TACC3, maskin	transforming acidic coiled-coil-containing protein 3	map03013	RNA transport	http://www.kegg.jp/kegg-bin/show_pathway?map03013+K14283
A6NLH6	K20368	CNIH, ERV14	protein cornichon
D6RIZ4
H0YNP9	K01139	spoT, HDDC3	guanosine-3',5'-bis(diphosphate) 3'-pyrophosphohydrolase [EC:3.1.7.2;]	map00230	Purine metabolism	http://www.kegg.jp/kegg-bin/show_pathway?map00230+K01139
Q6QN92	K02437	gcvH, GCSH	glycine cleavage system H protein	map00260	Glycine, serine and threonine metabolism	http://www.kegg.jp/kegg-bin/show_pathway?map00260+K02437
Q6QN92	K02437	gcvH, GCSH	glycine cleavage system H protein	map00630	Glyoxylate and dicarboxylate metabolism	http://www.kegg.jp/kegg-bin/show_pathway?map00630+K02437
P07311	K01512	acyP	acylphosphatase [EC:3.6.1.7;]	map00620	Pyruvate metabolism	http://www.kegg.jp/kegg-bin/show_pathway?map00620+K01512
P07311	K01512	acyP	acylphosphatase [EC:3.6.1.7;]	map00627	Aminobenzoate degradation	http://www.kegg.jp/kegg-bin/show_pathway?map00627+K01512
K7EQL1
A0A140VJE0	K00856	E2.7.1.20, ADK	adenosine kinase [EC:2.7.1.20;]	map00230	Purine metabolism	http://www.kegg.jp/kegg-bin/show_pathway?map00230+K00856
O00458
B5BU78	K18041	PTP4A	protein tyrosine phosphatase type IVA [EC:3.1.3.48;]
B0AZV9	K20304	TRAPPC6, TRS33	trafficking protein particle complex subunit 6
P82914	K02956	RP-S15, MRPS15, rpsO	small subunit ribosomal protein S15	map03010	Ribosome	http://www.kegg.jp/kegg-bin/show_pathway?map03010+K02956
Q9UJC5
Q86U90
P17096	K09282	HMGA1	high mobility group AT-hook protein 1
Q92604	K13514	LPGAT1	lysophosphatidylglycerol acyltransferase 1 [EC:2.3.1.-]	map00564	Glycerophospholipid metabolism	http://www.kegg.jp/kegg-bin/show_pathway?map00564+K13514
A0A097PY54	K02126	ATPeF0A, MTATP6, ATP6	F-type H+-transporting ATPase subunit a	map00190	Oxidative phosphorylation	http://www.kegg.jp/kegg-bin/show_pathway?map00190+K02126
A0A097PY54	K02126	ATPeF0A, MTATP6, ATP6	F-type H+-transporting ATPase subunit a	map05010	Alzheimer's disease	http://www.kegg.jp/kegg-bin/show_pathway?map05010+K02126
A0A097PY54	K02126	ATPeF0A, MTATP6, ATP6	F-type H+-transporting ATPase subunit a	map05012	Parkinson's disease	http://www.kegg.jp/kegg-bin/show_pathway?map05012+K02126
A0A097PY54	K02126	ATPeF0A, MTATP6, ATP6	F-type H+-transporting ATPase subunit a	map05016	Huntington's disease	http://www.kegg.jp/kegg-bin/show_pathway?map05016+K02126
O75911	K11146	DHRS3	short-chain dehydrogenase/reductase 3 [EC:1.1.1.300;]	map00830	Retinol metabolism	http://www.kegg.jp/kegg-bin/show_pathway?map00830+K11146
Q5JR08	K07857	RHOC	Ras homolog gene family, member C
Q03169	K19989	TNFAIP2, EXOC3L3	tumor necrosis factor alpha-induced protein 2
P53609	K11713	PGTB1	geranylgeranyl transferase type-1 subunit beta [EC:2.5.1.59;]
A0A024R2W4	K06265	DAG1	dystroglycan 1	map04512	ECM-receptor interaction	http://www.kegg.jp/kegg-bin/show_pathway?map04512+K06265
A0A024R2W4	K06265	DAG1	dystroglycan 1	map05410	Hypertrophic cardiomyopathy (HCM)	http://www.kegg.jp/kegg-bin/show_pathway?map05410+K06265
A0A024R2W4	K06265	DAG1	dystroglycan 1	map05412	Arrhythmogenic right ventricular cardiomyopathy (ARVC)	http://www.kegg.jp/kegg-bin/show_pathway?map05412+K06265
A0A024R2W4	K06265	DAG1	dystroglycan 1	map05414	Dilated cardiomyopathy	http://www.kegg.jp/kegg-bin/show_pathway?map05414+K06265
A0A024R2W4	K06265	DAG1	dystroglycan 1	map05416	Viral myocarditis	http://www.kegg.jp/kegg-bin/show_pathway?map05416+K06265
A0A024R8K7	K06525	ITGB4, CD104	integrin beta 4	map04151	PI3K-Akt signaling pathway	http://www.kegg.jp/kegg-bin/show_pathway?map04151+K06525
A0A024R8K7	K06525	ITGB4, CD104	integrin beta 4	map04510	Focal adhesion	http://www.kegg.jp/kegg-bin/show_pathway?map04510+K06525
A0A024R8K7	K06525	ITGB4, CD104	integrin beta 4	map04512	ECM-receptor interaction	http://www.kegg.jp/kegg-bin/show_pathway?map04512+K06525
A0A024R8K7	K06525	ITGB4, CD104	integrin beta 4	map04810	Regulation of actin cytoskeleton	http://www.kegg.jp/kegg-bin/show_pathway?map04810+K06525
A0A024R8K7	K06525	ITGB4, CD104	integrin beta 4	map05410	Hypertrophic cardiomyopathy (HCM)	http://www.kegg.jp/kegg-bin/show_pathway?map05410+K06525
A0A024R8K7	K06525	ITGB4, CD104	integrin beta 4	map05412	Arrhythmogenic right ventricular cardiomyopathy (ARVC)	http://www.kegg.jp/kegg-bin/show_pathway?map05412+K06525
A0A024R8K7	K06525	ITGB4, CD104	integrin beta 4	map05414	Dilated cardiomyopathy	http://www.kegg.jp/kegg-bin/show_pathway?map05414+K06525
B4DND9	K14840	NOP53, GLTSCR2	nucleolar protein 53	map05168	Herpes simplex infection	http://www.kegg.jp/kegg-bin/show_pathway?map05168+K14840
Q9NY93	K14810	DDX56, DBP9	ATP-dependent RNA helicase DDX56/DBP9 [EC:3.6.4.13;]
P84101
P62269	K02964	RP-S18e, RPS18	small subunit ribosomal protein S18e	map03010	Ribosome	http://www.kegg.jp/kegg-bin/show_pathway?map03010+K02964
A0A0S2Z5K6	K14001	SIL1, SLS1	nucleotide exchange factor SIL1	map04141	Protein processing in endoplasmic reticulum	http://www.kegg.jp/kegg-bin/show_pathway?map04141+K14001
Q8N5I2
Q9H9Y2	K14846	RPF1	ribosome production factor 1
O95478	K14842	NSA2	ribosome biogenesis protein NSA2
A0A024R8I8
Q8IY37	K14780	DHX37, DHR1	ATP-dependent RNA helicase DHX37/DHR1 [EC:3.6.4.13;]
A8K7D9	K15043	KPNA2	importin subunit alpha-2	map05164	Influenza A	http://www.kegg.jp/kegg-bin/show_pathway?map05164+K15043
A0A024RDF4	K13044	HNRNPABD	heterogeneous nuclear ribonucleoprotein A/B/D
Q5JXX1
B3KS36
B3KRC6	K05917	CYP51	sterol 14-demethylase [EC:1.14.13.70;]	map00100	Steroid biosynthesis	http://www.kegg.jp/kegg-bin/show_pathway?map00100+K05917
B3KXW2
Q12872
Q13823	K14537	NUG2, GNL2	nuclear GTP-binding protein	map03008	Ribosome biogenesis in eukaryotes	http://www.kegg.jp/kegg-bin/show_pathway?map03008+K14537
Q9BVJ6	K14567	UTP14	U3 small nucleolar RNA-associated protein 14	map03008	Ribosome biogenesis in eukaryotes	http://www.kegg.jp/kegg-bin/show_pathway?map03008+K14567
Q9Y6H1
M0R338
Q9NSI2
F8VZJ2
P08581	K05099	MET, HGFR	proto-oncogene tyrosine-protein kinase Met [EC:2.7.10.1;]	map01521	EGFR tyrosine kinase inhibitor resistance	http://www.kegg.jp/kegg-bin/show_pathway?map01521+K05099
P08581	K05099	MET, HGFR	proto-oncogene tyrosine-protein kinase Met [EC:2.7.10.1;]	map04014	Ras signaling pathway	http://www.kegg.jp/kegg-bin/show_pathway?map04014+K05099
P08581	K05099	MET, HGFR	proto-oncogene tyrosine-protein kinase Met [EC:2.7.10.1;]	map04015	Rap1 signaling pathway	http://www.kegg.jp/kegg-bin/show_pathway?map04015+K05099
P08581	K05099	MET, HGFR	proto-oncogene tyrosine-protein kinase Met [EC:2.7.10.1;]	map04060	Cytokine-cytokine receptor interaction	http://www.kegg.jp/kegg-bin/show_pathway?map04060+K05099
P08581	K05099	MET, HGFR	proto-oncogene tyrosine-protein kinase Met [EC:2.7.10.1;]	map04144	Endocytosis	http://www.kegg.jp/kegg-bin/show_pathway?map04144+K05099
P08581	K05099	MET, HGFR	proto-oncogene tyrosine-protein kinase Met [EC:2.7.10.1;]	map04151	PI3K-Akt signaling pathway	http://www.kegg.jp/kegg-bin/show_pathway?map04151+K05099
P08581	K05099	MET, HGFR	proto-oncogene tyrosine-protein kinase Met [EC:2.7.10.1;]	map04360	Axon guidance	http://www.kegg.jp/kegg-bin/show_pathway?map04360+K05099
P08581	K05099	MET, HGFR	proto-oncogene tyrosine-protein kinase Met [EC:2.7.10.1;]	map04510	Focal adhesion	http://www.kegg.jp/kegg-bin/show_pathway?map04510+K05099
P08581	K05099	MET, HGFR	proto-oncogene tyrosine-protein kinase Met [EC:2.7.10.1;]	map04520	Adherens junction	http://www.kegg.jp/kegg-bin/show_pathway?map04520+K05099
P08581	K05099	MET, HGFR	proto-oncogene tyrosine-protein kinase Met [EC:2.7.10.1;]	map05100	Bacterial invasion of epithelial cells	http://www.kegg.jp/kegg-bin/show_pathway?map05100+K05099
P08581	K05099	MET, HGFR	proto-oncogene tyrosine-protein kinase Met [EC:2.7.10.1;]	map05120	Epithelial cell signaling in Helicobacter pylori infection	http://www.kegg.jp/kegg-bin/show_pathway?map05120+K05099
P08581	K05099	MET, HGFR	proto-oncogene tyrosine-protein kinase Met [EC:2.7.10.1;]	map05144	Malaria	http://www.kegg.jp/kegg-bin/show_pathway?map05144+K05099
P08581	K05099	MET, HGFR	proto-oncogene tyrosine-protein kinase Met [EC:2.7.10.1;]	map05200	Pathways in cancer	http://www.kegg.jp/kegg-bin/show_pathway?map05200+K05099
P08581	K05099	MET, HGFR	proto-oncogene tyrosine-protein kinase Met [EC:2.7.10.1;]	map05202	Transcriptional misregulation in cancer	http://www.kegg.jp/kegg-bin/show_pathway?map05202+K05099
P08581	K05099	MET, HGFR	proto-oncogene tyrosine-protein kinase Met [EC:2.7.10.1;]	map05205	Proteoglycans in cancer	http://www.kegg.jp/kegg-bin/show_pathway?map05205+K05099
P08581	K05099	MET, HGFR	proto-oncogene tyrosine-protein kinase Met [EC:2.7.10.1;]	map05206	MicroRNAs in cancer	http://www.kegg.jp/kegg-bin/show_pathway?map05206+K05099
P08581	K05099	MET, HGFR	proto-oncogene tyrosine-protein kinase Met [EC:2.7.10.1;]	map05211	Renal cell carcinoma	http://www.kegg.jp/kegg-bin/show_pathway?map05211+K05099
P08581	K05099	MET, HGFR	proto-oncogene tyrosine-protein kinase Met [EC:2.7.10.1;]	map05218	Melanoma	http://www.kegg.jp/kegg-bin/show_pathway?map05218+K05099
P08581	K05099	MET, HGFR	proto-oncogene tyrosine-protein kinase Met [EC:2.7.10.1;]	map05230	Central carbon metabolism in cancer	http://www.kegg.jp/kegg-bin/show_pathway?map05230+K05099
Q5T280	K09142	K09142	uncharacterized protein
P08582	K06569	MFI2, CD228	melanoma-associated antigen p97
B2R4U3	K06688	UBE2C, UBC11	ubiquitin-conjugating enzyme E2 C [EC:2.3.2.23;]	map04120	Ubiquitin mediated proteolysis	http://www.kegg.jp/kegg-bin/show_pathway?map04120+K06688
Q96T88	K10638	UHRF1, NP95	E3 ubiquitin-protein ligase UHRF1 [EC:2.3.2.27;]
B4DE67	K01052	LIPA	lysosomal acid lipase/cholesteryl ester hydrolase [EC:3.1.1.13;]	map00100	Steroid biosynthesis	http://www.kegg.jp/kegg-bin/show_pathway?map00100+K01052
B4DE67	K01052	LIPA	lysosomal acid lipase/cholesteryl ester hydrolase [EC:3.1.1.13;]	map04142	Lysosome	http://www.kegg.jp/kegg-bin/show_pathway?map04142+K01052
P63173	K02923	RP-L38e, RPL38	large subunit ribosomal protein L38e	map03010	Ribosome	http://www.kegg.jp/kegg-bin/show_pathway?map03010+K02923
Q96GA3	K14798	LTV1	protein LTV1
A0A087X1T2	K09107	SREBP2, SREBF2	sterol regulatory element-binding transcription factor 2
Q8N4P8	K06943	NOG1	nucleolar GTP-binding protein	map03008	Ribosome biogenesis in eukaryotes	http://www.kegg.jp/kegg-bin/show_pathway?map03008+K06943
B2R4N3	K13113	UBL5, HUB1	ubiquitin-like protein 5	map04212	Longevity regulating pathway - worm	http://www.kegg.jp/kegg-bin/show_pathway?map04212+K13113
O00767	K00507	SCD, desC	stearoyl-CoA desaturase (Delta-9 desaturase) [EC:1.14.19.1;]	map01040	Biosynthesis of unsaturated fatty acids	http://www.kegg.jp/kegg-bin/show_pathway?map01040+K00507
O00767	K00507	SCD, desC	stearoyl-CoA desaturase (Delta-9 desaturase) [EC:1.14.19.1;]	map01212	Fatty acid metabolism	http://www.kegg.jp/kegg-bin/show_pathway?map01212+K00507
O00767	K00507	SCD, desC	stearoyl-CoA desaturase (Delta-9 desaturase) [EC:1.14.19.1;]	map03320	PPAR signaling pathway	http://www.kegg.jp/kegg-bin/show_pathway?map03320+K00507
O00767	K00507	SCD, desC	stearoyl-CoA desaturase (Delta-9 desaturase) [EC:1.14.19.1;]	map04152	AMPK signaling pathway	http://www.kegg.jp/kegg-bin/show_pathway?map04152+K00507
O00767	K00507	SCD, desC	stearoyl-CoA desaturase (Delta-9 desaturase) [EC:1.14.19.1;]	map04212	Longevity regulating pathway - worm	http://www.kegg.jp/kegg-bin/show_pathway?map04212+K00507
H3BMQ2	K02896	RP-L24e, RPL24	large subunit ribosomal protein L24e	map03010	Ribosome	http://www.kegg.jp/kegg-bin/show_pathway?map03010+K02896
O15230	K06240	LAMA3_5	laminin, alpha 3/5	map04151	PI3K-Akt signaling pathway	http://www.kegg.jp/kegg-bin/show_pathway?map04151+K06240
O15230	K06240	LAMA3_5	laminin, alpha 3/5	map04510	Focal adhesion	http://www.kegg.jp/kegg-bin/show_pathway?map04510+K06240
O15230	K06240	LAMA3_5	laminin, alpha 3/5	map04512	ECM-receptor interaction	http://www.kegg.jp/kegg-bin/show_pathway?map04512+K06240
O15230	K06240	LAMA3_5	laminin, alpha 3/5	map05145	Toxoplasmosis	http://www.kegg.jp/kegg-bin/show_pathway?map05145+K06240
O15230	K06240	LAMA3_5	laminin, alpha 3/5	map05146	Amoebiasis	http://www.kegg.jp/kegg-bin/show_pathway?map05146+K06240
O15230	K06240	LAMA3_5	laminin, alpha 3/5	map05200	Pathways in cancer	http://www.kegg.jp/kegg-bin/show_pathway?map05200+K06240
O15230	K06240	LAMA3_5	laminin, alpha 3/5	map05222	Small cell lung cancer	http://www.kegg.jp/kegg-bin/show_pathway?map05222+K06240
P62081	K02993	RP-S7e, RPS7	small subunit ribosomal protein S7e	map03010	Ribosome	http://www.kegg.jp/kegg-bin/show_pathway?map03010+K02993
E9PM82	K18666	ASCC1	activating signal cointegrator complex subunit 1
Q5VV42	K15865	CDKAL1	threonylcarbamoyladenosine tRNA methylthiotransferase CDKAL1 [EC:2.8.4.5;]
B4DE48	K17929	SNX17	sorting nexin-17
B4DT46	K08009	CYBA, P22PHOX	cytochrome b-245, alpha polypeptide	map04145	Phagosome	http://www.kegg.jp/kegg-bin/show_pathway?map04145+K08009
B4DT46	K08009	CYBA, P22PHOX	cytochrome b-245, alpha polypeptide	map04380	Osteoclast differentiation	http://www.kegg.jp/kegg-bin/show_pathway?map04380+K08009
B4DT46	K08009	CYBA, P22PHOX	cytochrome b-245, alpha polypeptide	map04621	NOD-like receptor signaling pathway	http://www.kegg.jp/kegg-bin/show_pathway?map04621+K08009
B4DT46	K08009	CYBA, P22PHOX	cytochrome b-245, alpha polypeptide	map04670	Leukocyte transendothelial migration	http://www.kegg.jp/kegg-bin/show_pathway?map04670+K08009
B4DT46	K08009	CYBA, P22PHOX	cytochrome b-245, alpha polypeptide	map05140	Leishmaniasis	http://www.kegg.jp/kegg-bin/show_pathway?map05140+K08009
C9JCN8	K09030	FOSL2	fos-like antigen 2	map04380	Osteoclast differentiation	http://www.kegg.jp/kegg-bin/show_pathway?map04380+K09030
B3KNS8
F6TR53
Q2M2H8	K12047	MGAM	maltase-glucoamylase [EC:3.2.1.20;3.2.1.3;]	map00052	Galactose metabolism	http://www.kegg.jp/kegg-bin/show_pathway?map00052+K12047
Q2M2H8	K12047	MGAM	maltase-glucoamylase [EC:3.2.1.20;3.2.1.3;]	map00500	Starch and sucrose metabolism	http://www.kegg.jp/kegg-bin/show_pathway?map00500+K12047
Q2M2H8	K12047	MGAM	maltase-glucoamylase [EC:3.2.1.20;3.2.1.3;]	map04973	Carbohydrate digestion and absorption	http://www.kegg.jp/kegg-bin/show_pathway?map04973+K12047
Q09472	K04498	EP300, CREBBP, KAT3	E1A/CREB-binding protein [EC:2.3.1.48;]	map04024	cAMP signaling pathway	http://www.kegg.jp/kegg-bin/show_pathway?map04024+K04498
Q09472	K04498	EP300, CREBBP, KAT3	E1A/CREB-binding protein [EC:2.3.1.48;]	map04066	HIF-1 signaling pathway	http://www.kegg.jp/kegg-bin/show_pathway?map04066+K04498
Q09472	K04498	EP300, CREBBP, KAT3	E1A/CREB-binding protein [EC:2.3.1.48;]	map04068	FoxO signaling pathway	http://www.kegg.jp/kegg-bin/show_pathway?map04068+K04498
Q09472	K04498	EP300, CREBBP, KAT3	E1A/CREB-binding protein [EC:2.3.1.48;]	map04110	Cell cycle	http://www.kegg.jp/kegg-bin/show_pathway?map04110+K04498
Q09472	K04498	EP300, CREBBP, KAT3	E1A/CREB-binding protein [EC:2.3.1.48;]	map04310	Wnt signaling pathway	http://www.kegg.jp/kegg-bin/show_pathway?map04310+K04498
Q09472	K04498	EP300, CREBBP, KAT3	E1A/CREB-binding protein [EC:2.3.1.48;]	map04330	Notch signaling pathway	http://www.kegg.jp/kegg-bin/show_pathway?map04330+K04498
Q09472	K04498	EP300, CREBBP, KAT3	E1A/CREB-binding protein [EC:2.3.1.48;]	map04350	TGF-beta signaling pathway	http://www.kegg.jp/kegg-bin/show_pathway?map04350+K04498
Q09472	K04498	EP300, CREBBP, KAT3	E1A/CREB-binding protein [EC:2.3.1.48;]	map04520	Adherens junction	http://www.kegg.jp/kegg-bin/show_pathway?map04520+K04498
Q09472	K04498	EP300, CREBBP, KAT3	E1A/CREB-binding protein [EC:2.3.1.48;]	map04630	Jak-STAT signaling pathway	http://www.kegg.jp/kegg-bin/show_pathway?map04630+K04498
Q09472	K04498	EP300, CREBBP, KAT3	E1A/CREB-binding protein [EC:2.3.1.48;]	map04720	Long-term potentiation	http://www.kegg.jp/kegg-bin/show_pathway?map04720+K04498
Q09472	K04498	EP300, CREBBP, KAT3	E1A/CREB-binding protein [EC:2.3.1.48;]	map04916	Melanogenesis	http://www.kegg.jp/kegg-bin/show_pathway?map04916+K04498
Q09472	K04498	EP300, CREBBP, KAT3	E1A/CREB-binding protein [EC:2.3.1.48;]	map04919	Thyroid hormone signaling pathway	http://www.kegg.jp/kegg-bin/show_pathway?map04919+K04498
Q09472	K04498	EP300, CREBBP, KAT3	E1A/CREB-binding protein [EC:2.3.1.48;]	map04922	Glucagon signaling pathway	http://www.kegg.jp/kegg-bin/show_pathway?map04922+K04498
Q09472	K04498	EP300, CREBBP, KAT3	E1A/CREB-binding protein [EC:2.3.1.48;]	map05016	Huntington's disease	http://www.kegg.jp/kegg-bin/show_pathway?map05016+K04498
Q09472	K04498	EP300, CREBBP, KAT3	E1A/CREB-binding protein [EC:2.3.1.48;]	map05152	Tuberculosis	http://www.kegg.jp/kegg-bin/show_pathway?map05152+K04498
Q09472	K04498	EP300, CREBBP, KAT3	E1A/CREB-binding protein [EC:2.3.1.48;]	map05161	Hepatitis B	http://www.kegg.jp/kegg-bin/show_pathway?map05161+K04498
Q09472	K04498	EP300, CREBBP, KAT3	E1A/CREB-binding protein [EC:2.3.1.48;]	map05164	Influenza A	http://www.kegg.jp/kegg-bin/show_pathway?map05164+K04498
Q09472	K04498	EP300, CREBBP, KAT3	E1A/CREB-binding protein [EC:2.3.1.48;]	map05166	HTLV-I infection	http://www.kegg.jp/kegg-bin/show_pathway?map05166+K04498
Q09472	K04498	EP300, CREBBP, KAT3	E1A/CREB-binding protein [EC:2.3.1.48;]	map05168	Herpes simplex infection	http://www.kegg.jp/kegg-bin/show_pathway?map05168+K04498
Q09472	K04498	EP300, CREBBP, KAT3	E1A/CREB-binding protein [EC:2.3.1.48;]	map05169	Epstein-Barr virus infection	http://www.kegg.jp/kegg-bin/show_pathway?map05169+K04498
Q09472	K04498	EP300, CREBBP, KAT3	E1A/CREB-binding protein [EC:2.3.1.48;]	map05200	Pathways in cancer	http://www.kegg.jp/kegg-bin/show_pathway?map05200+K04498
Q09472	K04498	EP300, CREBBP, KAT3	E1A/CREB-binding protein [EC:2.3.1.48;]	map05203	Viral carcinogenesis	http://www.kegg.jp/kegg-bin/show_pathway?map05203+K04498
Q09472	K04498	EP300, CREBBP, KAT3	E1A/CREB-binding protein [EC:2.3.1.48;]	map05206	MicroRNAs in cancer	http://www.kegg.jp/kegg-bin/show_pathway?map05206+K04498
Q09472	K04498	EP300, CREBBP, KAT3	E1A/CREB-binding protein [EC:2.3.1.48;]	map05211	Renal cell carcinoma	http://www.kegg.jp/kegg-bin/show_pathway?map05211+K04498
Q09472	K04498	EP300, CREBBP, KAT3	E1A/CREB-binding protein [EC:2.3.1.48;]	map05215	Prostate cancer	http://www.kegg.jp/kegg-bin/show_pathway?map05215+K04498
H0UI22	K01887	RARS, argS	arginyl-tRNA synthetase [EC:6.1.1.19;]	map00970	Aminoacyl-tRNA biosynthesis	http://www.kegg.jp/kegg-bin/show_pathway?map00970+K01887
Q6PJ25	K01530	E3.6.3.1	phospholipid-translocating ATPase [EC:3.6.3.1;]
A8K201
Q52LW3	K20644	ARHGAP29_45	Rho GTPase-activating protein 29/45
D3DR37	K16456	CEP55	centrosomal protein CEP55
A0A0A0MTB0
P52735	K05730	VAV	guanine nucleotide exchange factor VAV	map04024	cAMP signaling pathway	http://www.kegg.jp/kegg-bin/show_pathway?map04024+K05730
P52735	K05730	VAV	guanine nucleotide exchange factor VAV	map04062	Chemokine signaling pathway	http://www.kegg.jp/kegg-bin/show_pathway?map04062+K05730
P52735	K05730	VAV	guanine nucleotide exchange factor VAV	map04510	Focal adhesion	http://www.kegg.jp/kegg-bin/show_pathway?map04510+K05730
P52735	K05730	VAV	guanine nucleotide exchange factor VAV	map04650	Natural killer cell mediated cytotoxicity	http://www.kegg.jp/kegg-bin/show_pathway?map04650+K05730
P52735	K05730	VAV	guanine nucleotide exchange factor VAV	map04660	T cell receptor signaling pathway	http://www.kegg.jp/kegg-bin/show_pathway?map04660+K05730
P52735	K05730	VAV	guanine nucleotide exchange factor VAV	map04662	B cell receptor signaling pathway	http://www.kegg.jp/kegg-bin/show_pathway?map04662+K05730
P52735	K05730	VAV	guanine nucleotide exchange factor VAV	map04664	Fc epsilon RI signaling pathway	http://www.kegg.jp/kegg-bin/show_pathway?map04664+K05730
P52735	K05730	VAV	guanine nucleotide exchange factor VAV	map04666	Fc gamma R-mediated phagocytosis	http://www.kegg.jp/kegg-bin/show_pathway?map04666+K05730
P52735	K05730	VAV	guanine nucleotide exchange factor VAV	map04670	Leukocyte transendothelial migration	http://www.kegg.jp/kegg-bin/show_pathway?map04670+K05730
P52735	K05730	VAV	guanine nucleotide exchange factor VAV	map04810	Regulation of actin cytoskeleton	http://www.kegg.jp/kegg-bin/show_pathway?map04810+K05730
Q75MX0
P62861	K02983	RP-S30e, RPS30	small subunit ribosomal protein S30e	map03010	Ribosome	http://www.kegg.jp/kegg-bin/show_pathway?map03010+K02983
Q9Y4B5
Q13895	K14797	ENP1, BYSL	essential nuclear protein 1
Q6DKI1
E9PLD3
B2R841	K06631	PLK1	polo-like kinase 1 [EC:2.7.11.21;]	map04068	FoxO signaling pathway	http://www.kegg.jp/kegg-bin/show_pathway?map04068+K06631
B2R841	K06631	PLK1	polo-like kinase 1 [EC:2.7.11.21;]	map04110	Cell cycle	http://www.kegg.jp/kegg-bin/show_pathway?map04110+K06631
B2R841	K06631	PLK1	polo-like kinase 1 [EC:2.7.11.21;]	map04114	Oocyte meiosis	http://www.kegg.jp/kegg-bin/show_pathway?map04114+K06631
B2R841	K06631	PLK1	polo-like kinase 1 [EC:2.7.11.21;]	map04914	Progesterone-mediated oocyte maturation	http://www.kegg.jp/kegg-bin/show_pathway?map04914+K06631
O75438	K03957	NDUFB1	NADH dehydrogenase (ubiquinone) 1 beta subcomplex subunit 1	map00190	Oxidative phosphorylation	http://www.kegg.jp/kegg-bin/show_pathway?map00190+K03957
O75438	K03957	NDUFB1	NADH dehydrogenase (ubiquinone) 1 beta subcomplex subunit 1	map04932	Non-alcoholic fatty liver disease (NAFLD)	http://www.kegg.jp/kegg-bin/show_pathway?map04932+K03957
O75438	K03957	NDUFB1	NADH dehydrogenase (ubiquinone) 1 beta subcomplex subunit 1	map05010	Alzheimer's disease	http://www.kegg.jp/kegg-bin/show_pathway?map05010+K03957
O75438	K03957	NDUFB1	NADH dehydrogenase (ubiquinone) 1 beta subcomplex subunit 1	map05012	Parkinson's disease	http://www.kegg.jp/kegg-bin/show_pathway?map05012+K03957
O75438	K03957	NDUFB1	NADH dehydrogenase (ubiquinone) 1 beta subcomplex subunit 1	map05016	Huntington's disease	http://www.kegg.jp/kegg-bin/show_pathway?map05016+K03957
D6RBD9
Q9HBR0	K14996	SLC38A10	solute carrier family 38 (sodium-coupled neutral amino acid transporter), member 10
A5YRV2	K06568	MUC1, CD227	mucin 1, transmembrane
Q6FHK1	K02902	RP-L28, MRPL28, rpmB	large subunit ribosomal protein L28	map03010	Ribosome	http://www.kegg.jp/kegg-bin/show_pathway?map03010+K02902
P62857	K02979	RP-S28e, RPS28	small subunit ribosomal protein S28e	map03010	Ribosome	http://www.kegg.jp/kegg-bin/show_pathway?map03010+K02979
Q96EX3
B4DYY3	K16746	BBS1	Bardet-Biedl syndrome 1 protein
Q14517	K16506	FAT1_2_3	protocadherin Fat 1/2/3
P62273	K02980	RP-S29e, RPS29	small subunit ribosomal protein S29e	map03010	Ribosome	http://www.kegg.jp/kegg-bin/show_pathway?map03010+K02980
Q9Y3C1
I3L172
A8KAQ3	K12388	SORT1	sortilin	map04142	Lysosome	http://www.kegg.jp/kegg-bin/show_pathway?map04142+K12388
A8KAQ3	K12388	SORT1	sortilin	map04722	Neurotrophin signaling pathway	http://www.kegg.jp/kegg-bin/show_pathway?map04722+K12388
Q5TEC6	K11253	H3	histone H3	map05034	Alcoholism	http://www.kegg.jp/kegg-bin/show_pathway?map05034+K11253
Q5TEC6	K11253	H3	histone H3	map05202	Transcriptional misregulation in cancer	http://www.kegg.jp/kegg-bin/show_pathway?map05202+K11253
Q5TEC6	K11253	H3	histone H3	map05322	Systemic lupus erythematosus	http://www.kegg.jp/kegg-bin/show_pathway?map05322+K11253
Q8NEF9
B2R823	K11884	PNO1, DIM2	RNA-binding protein PNO1
Q9H5M4	K08958	CSNK1G	casein kinase 1, gamma [EC:2.7.11.1;]	map04340	Hedgehog signaling pathway	http://www.kegg.jp/kegg-bin/show_pathway?map04340+K08958
Q9H5M4	K08958	CSNK1G	casein kinase 1, gamma [EC:2.7.11.1;]	map04341	Hedgehog signaling pathway - fly	http://www.kegg.jp/kegg-bin/show_pathway?map04341+K08958
J3QR09	K02885	RP-L19e, RPL19	large subunit ribosomal protein L19e	map03010	Ribosome	http://www.kegg.jp/kegg-bin/show_pathway?map03010+K02885
O43805	K16780	SSNA1	sjoegren syndrome nuclear autoantigen 1
Q9BVP2	K14538	NUG1, GNL3	nuclear GTP-binding protein	map03008	Ribosome biogenesis in eukaryotes	http://www.kegg.jp/kegg-bin/show_pathway?map03008+K14538
P83881	K02929	RP-L44e, RPL44	large subunit ribosomal protein L44e	map03010	Ribosome	http://www.kegg.jp/kegg-bin/show_pathway?map03010+K02929

## Sheet: map2query
KEGG pathway analysis OXA-treated MKN-45 cells protein functions map2query.
Map_ID	Map_Name	Seqs	Seqs_Num	URL
map05230	Central carbon metabolism in cancer	P08581	1	http://www.kegg.jp/kegg-bin/show_pathway?map05230+K05099
map05012	Parkinson's disease	O43678 A0A097PY54 O75438	3	http://www.kegg.jp/kegg-bin/show_pathway?map05012+K03946+K02126+K03957
map01521	EGFR tyrosine kinase inhibitor resistance	P08581	1	http://www.kegg.jp/kegg-bin/show_pathway?map01521+K05099
map04340	Hedgehog signaling pathway	Q9H5M4	1	http://www.kegg.jp/kegg-bin/show_pathway?map04340+K08958
map04666	Fc gamma R-mediated phagocytosis	P52735	1	http://www.kegg.jp/kegg-bin/show_pathway?map04666+K05730
map04932	Non-alcoholic fatty liver disease (NAFLD)	O43678 B6CGU5 O75438	3	http://www.kegg.jp/kegg-bin/show_pathway?map04932+K03946+K04398+K03957
map03320	PPAR signaling pathway	O00767	1	http://www.kegg.jp/kegg-bin/show_pathway?map03320+K00507
map04210	Apoptosis	B6CGU5	1	http://www.kegg.jp/kegg-bin/show_pathway?map04210+K04398
map00052	Galactose metabolism	Q2M2H8	1	http://www.kegg.jp/kegg-bin/show_pathway?map00052+K12047
map04120	Ubiquitin mediated proteolysis	B2R4U3	1	http://www.kegg.jp/kegg-bin/show_pathway?map04120+K06688
map01524	Platinum drug resistance	B6CGU5	1	http://www.kegg.jp/kegg-bin/show_pathway?map01524+K04398
map04720	Long-term potentiation	Q09472	1	http://www.kegg.jp/kegg-bin/show_pathway?map04720+K04498
map00230	Purine metabolism	H0YNP9 A0A140VJE0	2	http://www.kegg.jp/kegg-bin/show_pathway?map00230+K01139+K00856
map04721	Synaptic vesicle cycle	A0A024R7S3	1	http://www.kegg.jp/kegg-bin/show_pathway?map04721+K04645
map03010	Ribosome	P82914 P62269 P63173 H3BMQ2 P62081 P62861 Q6FHK1 P62857 P62273 J3QR09 P83881	11	http://www.kegg.jp/kegg-bin/show_pathway?map03010+K02956+K02964+K02923+K02896+K02993+K02983+K02902+K02979+K02980+K02885+K02929
map04215	Apoptosis - multiple species	B6CGU5	1	http://www.kegg.jp/kegg-bin/show_pathway?map04215+K04398
map05202	Transcriptional misregulation in cancer	F1JVV5 P08581 Q5TEC6	3	http://www.kegg.jp/kegg-bin/show_pathway?map05202+K09053+K05099+K11253
map05142	Chagas disease (American trypanosomiasis)	B6CGU5	1	http://www.kegg.jp/kegg-bin/show_pathway?map05142+K04398
map04142	Lysosome	A0A024R7S3 B4DE67 A8KAQ3	3	http://www.kegg.jp/kegg-bin/show_pathway?map04142+K04645+K01052+K12388
map04925	Aldosterone synthesis and secretion	F1JVV5	1	http://www.kegg.jp/kegg-bin/show_pathway?map04925+K09053
map04973	Carbohydrate digestion and absorption	Q2M2H8	1	http://www.kegg.jp/kegg-bin/show_pathway?map04973+K12047
map00190	Oxidative phosphorylation	O43678 A0A097PY54 O75438	3	http://www.kegg.jp/kegg-bin/show_pathway?map00190+K03946+K02126+K03957
map00564	Glycerophospholipid metabolism	Q92604	1	http://www.kegg.jp/kegg-bin/show_pathway?map00564+K13514
map05414	Dilated cardiomyopathy	A0A024R2W4 A0A024R8K7	2	http://www.kegg.jp/kegg-bin/show_pathway?map05414+K06265+K06525
map00627	Aminobenzoate degradation	P07311	1	http://www.kegg.jp/kegg-bin/show_pathway?map00627+K01512
map04214	Apoptosis - fly	B6CGU5	1	http://www.kegg.jp/kegg-bin/show_pathway?map04214+K04398
map04916	Melanogenesis	Q09472	1	http://www.kegg.jp/kegg-bin/show_pathway?map04916+K04498
map05016	Huntington's disease	A0A024R7S3 O43678 B6CGU5 A0A097PY54 Q09472 O75438	6	http://www.kegg.jp/kegg-bin/show_pathway?map05016+K04645+K03946+K04398+K02126+K04498+K03957
map04722	Neurotrophin signaling pathway	A8KAQ3	1	http://www.kegg.jp/kegg-bin/show_pathway?map04722+K12388
map03013	RNA transport	Q6IAM0 Q9Y6A5	2	http://www.kegg.jp/kegg-bin/show_pathway?map03013+K03248+K14283
map05412	Arrhythmogenic right ventricular cardiomyopathy (ARVC)	A0A024R2W4 A0A024R8K7	2	http://www.kegg.jp/kegg-bin/show_pathway?map05412+K06265+K06525
map04062	Chemokine signaling pathway	P52735	1	http://www.kegg.jp/kegg-bin/show_pathway?map04062+K05730
map04152	AMPK signaling pathway	O00767	1	http://www.kegg.jp/kegg-bin/show_pathway?map04152+K00507
map05164	Influenza A	A8K7D9 Q09472	2	http://www.kegg.jp/kegg-bin/show_pathway?map05164+K15043+K04498
map04014	Ras signaling pathway	P08581	1	http://www.kegg.jp/kegg-bin/show_pathway?map04014+K05099
map05034	Alcoholism	Q5TEC6	1	http://www.kegg.jp/kegg-bin/show_pathway?map05034+K11253
map05169	Epstein-Barr virus infection	Q09472	1	http://www.kegg.jp/kegg-bin/show_pathway?map05169+K04498
map05161	Hepatitis B	B6CGU5 Q09472	2	http://www.kegg.jp/kegg-bin/show_pathway?map05161+K04398+K04498
map04115	p53 signaling pathway	B6CGU5	1	http://www.kegg.jp/kegg-bin/show_pathway?map04115+K04398
map04145	Phagosome	B4DT46	1	http://www.kegg.jp/kegg-bin/show_pathway?map04145+K08009
map05200	Pathways in cancer	B6CGU5 P08581 O15230 Q09472	4	http://www.kegg.jp/kegg-bin/show_pathway?map05200+K04398+K05099+K06240+K04498
map04620	Toll-like receptor signaling pathway	B6CGU5	1	http://www.kegg.jp/kegg-bin/show_pathway?map04620+K04398
map04668	TNF signaling pathway	B6CGU5	1	http://www.kegg.jp/kegg-bin/show_pathway?map04668+K04398
map05322	Systemic lupus erythematosus	Q5TEC6	1	http://www.kegg.jp/kegg-bin/show_pathway?map05322+K11253
map04066	HIF-1 signaling pathway	Q09472	1	http://www.kegg.jp/kegg-bin/show_pathway?map04066+K04498
map04919	Thyroid hormone signaling pathway	Q09472	1	http://www.kegg.jp/kegg-bin/show_pathway?map04919+K04498
map04961	Endocrine and other factor-regulated calcium reabsorption	A0A024R7S3	1	http://www.kegg.jp/kegg-bin/show_pathway?map04961+K04645
map04141	Protein processing in endoplasmic reticulum	A0A0S2Z5K6	1	http://www.kegg.jp/kegg-bin/show_pathway?map04141+K14001
map04360	Axon guidance	P08581	1	http://www.kegg.jp/kegg-bin/show_pathway?map04360+K05099
map04060	Cytokine-cytokine receptor interaction	P08581	1	http://www.kegg.jp/kegg-bin/show_pathway?map04060+K05099
map04622	RIG-I-like receptor signaling pathway	B6CGU5	1	http://www.kegg.jp/kegg-bin/show_pathway?map04622+K04398
map04662	B cell receptor signaling pathway	P52735	1	http://www.kegg.jp/kegg-bin/show_pathway?map04662+K05730
map05152	Tuberculosis	B6CGU5 Q09472	2	http://www.kegg.jp/kegg-bin/show_pathway?map05152+K04398+K04498
map04512	ECM-receptor interaction	A0A024R2W4 A0A024R8K7 O15230	3	http://www.kegg.jp/kegg-bin/show_pathway?map04512+K06265+K06525+K06240
map04151	PI3K-Akt signaling pathway	A0A024R8K7 P08581 O15230	3	http://www.kegg.jp/kegg-bin/show_pathway?map04151+K06525+K05099+K06240
map01212	Fatty acid metabolism	O00767	1	http://www.kegg.jp/kegg-bin/show_pathway?map01212+K00507
map04624	Toll and Imd signaling pathway	B6CGU5	1	http://www.kegg.jp/kegg-bin/show_pathway?map04624+K04398
map04114	Oocyte meiosis	B2R841	1	http://www.kegg.jp/kegg-bin/show_pathway?map04114+K06631
map00970	Aminoacyl-tRNA biosynthesis	H0UI22	1	http://www.kegg.jp/kegg-bin/show_pathway?map00970+K01887
map05134	Legionellosis	B6CGU5	1	http://www.kegg.jp/kegg-bin/show_pathway?map05134+K04398
map00100	Steroid biosynthesis	B3KRC6 B4DE67	2	http://www.kegg.jp/kegg-bin/show_pathway?map00100+K05917+K01052
map01040	Biosynthesis of unsaturated fatty acids	O00767	1	http://www.kegg.jp/kegg-bin/show_pathway?map01040+K00507
map04015	Rap1 signaling pathway	P08581	1	http://www.kegg.jp/kegg-bin/show_pathway?map04015+K05099
map04068	FoxO signaling pathway	Q09472 B2R841	2	http://www.kegg.jp/kegg-bin/show_pathway?map04068+K04498+K06631
map00830	Retinol metabolism	O75911	1	http://www.kegg.jp/kegg-bin/show_pathway?map00830+K11146
map04110	Cell cycle	Q09472 B2R841	2	http://www.kegg.jp/kegg-bin/show_pathway?map04110+K04498+K06631
map03008	Ribosome biogenesis in eukaryotes	Q13823 Q9BVJ6 Q8N4P8 Q9BVP2	4	http://www.kegg.jp/kegg-bin/show_pathway?map03008+K14537+K14567+K06943+K14538
map05146	Amoebiasis	O15230	1	http://www.kegg.jp/kegg-bin/show_pathway?map05146+K06240
map05010	Alzheimer's disease	O43678 B6CGU5 A0A097PY54 O75438	4	http://www.kegg.jp/kegg-bin/show_pathway?map05010+K03946+K04398+K02126+K03957
map05140	Leishmaniasis	B4DT46	1	http://www.kegg.jp/kegg-bin/show_pathway?map05140+K08009
map04310	Wnt signaling pathway	Q09472	1	http://www.kegg.jp/kegg-bin/show_pathway?map04310+K04498
map05205	Proteoglycans in cancer	P08581	1	http://www.kegg.jp/kegg-bin/show_pathway?map05205+K05099
map05168	Herpes simplex infection	B6CGU5 B4DND9 Q09472	3	http://www.kegg.jp/kegg-bin/show_pathway?map05168+K04398+K14840+K04498
map05222	Small cell lung cancer	O15230	1	http://www.kegg.jp/kegg-bin/show_pathway?map05222+K06240
map04650	Natural killer cell mediated cytotoxicity	P52735	1	http://www.kegg.jp/kegg-bin/show_pathway?map04650+K05730
map05410	Hypertrophic cardiomyopathy (HCM)	A0A024R2W4 A0A024R8K7	2	http://www.kegg.jp/kegg-bin/show_pathway?map05410+K06265+K06525
map05203	Viral carcinogenesis	B6CGU5 Q09472	2	http://www.kegg.jp/kegg-bin/show_pathway?map05203+K04398+K04498
map00630	Glyoxylate and dicarboxylate metabolism	Q6QN92	1	http://www.kegg.jp/kegg-bin/show_pathway?map00630+K02437
map04350	TGF-beta signaling pathway	Q09472	1	http://www.kegg.jp/kegg-bin/show_pathway?map04350+K04498
map05218	Melanoma	P08581	1	http://www.kegg.jp/kegg-bin/show_pathway?map05218+K05099
map05206	MicroRNAs in cancer	P08581 Q09472	2	http://www.kegg.jp/kegg-bin/show_pathway?map05206+K05099+K04498
map04510	Focal adhesion	A0A024R8K7 P08581 O15230 P52735	4	http://www.kegg.jp/kegg-bin/show_pathway?map04510+K06525+K05099+K06240+K05730
map04330	Notch signaling pathway	Q09472	1	http://www.kegg.jp/kegg-bin/show_pathway?map04330+K04498
map04520	Adherens junction	P08581 Q09472	2	http://www.kegg.jp/kegg-bin/show_pathway?map04520+K05099+K04498
map05100	Bacterial invasion of epithelial cells	A0A024R7S3 P08581	2	http://www.kegg.jp/kegg-bin/show_pathway?map05100+K04645+K05099
map05211	Renal cell carcinoma	P08581 Q09472	2	http://www.kegg.jp/kegg-bin/show_pathway?map05211+K05099+K04498
map05215	Prostate cancer	Q09472	1	http://www.kegg.jp/kegg-bin/show_pathway?map05215+K04498
map05416	Viral myocarditis	B6CGU5 A0A024R2W4	2	http://www.kegg.jp/kegg-bin/show_pathway?map05416+K04398+K06265
map05144	Malaria	P08581	1	http://www.kegg.jp/kegg-bin/show_pathway?map05144+K05099
map04664	Fc epsilon RI signaling pathway	P52735	1	http://www.kegg.jp/kegg-bin/show_pathway?map04664+K05730
map04144	Endocytosis	A0A024R7S3 P08581	2	http://www.kegg.jp/kegg-bin/show_pathway?map04144+K04645+K05099
map05145	Toxoplasmosis	B6CGU5 O15230	2	http://www.kegg.jp/kegg-bin/show_pathway?map05145+K04398+K06240
map04212	Longevity regulating pathway - worm	B2R4N3 O00767	2	http://www.kegg.jp/kegg-bin/show_pathway?map04212+K13113+K00507
map04024	cAMP signaling pathway	Q09472 P52735	2	http://www.kegg.jp/kegg-bin/show_pathway?map04024+K04498+K05730
map00500	Starch and sucrose metabolism	Q2M2H8	1	http://www.kegg.jp/kegg-bin/show_pathway?map00500+K12047
map04380	Osteoclast differentiation	B4DT46 C9JCN8	2	http://www.kegg.jp/kegg-bin/show_pathway?map04380+K08009+K09030
map04670	Leukocyte transendothelial migration	B4DT46 P52735	2	http://www.kegg.jp/kegg-bin/show_pathway?map04670+K08009+K05730
map00260	Glycine, serine and threonine metabolism	Q6QN92	1	http://www.kegg.jp/kegg-bin/show_pathway?map00260+K02437
map04922	Glucagon signaling pathway	Q09472	1	http://www.kegg.jp/kegg-bin/show_pathway?map04922+K04498
map04621	NOD-like receptor signaling pathway	B6CGU5 B1ALI9 B4DT46	3	http://www.kegg.jp/kegg-bin/show_pathway?map04621+K04398+K20910+K08009
map04914	Progesterone-mediated oocyte maturation	B2R841	1	http://www.kegg.jp/kegg-bin/show_pathway?map04914+K06631
map04660	T cell receptor signaling pathway	P52735	1	http://www.kegg.jp/kegg-bin/show_pathway?map04660+K05730
map05120	Epithelial cell signaling in Helicobacter pylori infection	P08581	1	http://www.kegg.jp/kegg-bin/show_pathway?map05120+K05099
map05166	HTLV-I infection	F1JVV5 Q09472	2	http://www.kegg.jp/kegg-bin/show_pathway?map05166+K09053+K04498
map04810	Regulation of actin cytoskeleton	A0A024R8K7 P52735	2	http://www.kegg.jp/kegg-bin/show_pathway?map04810+K06525+K05730
map00620	Pyruvate metabolism	P07311	1	http://www.kegg.jp/kegg-bin/show_pathway?map00620+K01512
map04341	Hedgehog signaling pathway - fly	Q9H5M4	1	http://www.kegg.jp/kegg-bin/show_pathway?map04341+K08958
map04630	Jak-STAT signaling pathway	Q09472	1	http://www.kegg.jp/kegg-bin/show_pathway?map04630+K04498

## Sheet: TopMapStat
KEGG pathway analysis OXA-treated MKN-45 cells protein functions TopMapStat.
Map_ID	Map_Name	Seqs	Seqs_Num	URL
map03010	Ribosome	P82914 P62269 P63173 H3BMQ2 P62081 P62861 Q6FHK1 P62857 P62273 J3QR09 P83881	11	http://www.kegg.jp/kegg-bin/show_pathway?map03010+K02956+K02964+K02923+K02896+K02993+K02983+K02902+K02979+K02980+K02885+K02929
map05016	Huntington's disease	A0A024R7S3 O43678 B6CGU5 A0A097PY54 Q09472 O75438	6	http://www.kegg.jp/kegg-bin/show_pathway?map05016+K04645+K03946+K04398+K02126+K04498+K03957
map05200	Pathways in cancer	B6CGU5 P08581 O15230 Q09472	4	http://www.kegg.jp/kegg-bin/show_pathway?map05200+K04398+K05099+K06240+K04498
map03008	Ribosome biogenesis in eukaryotes	Q13823 Q9BVJ6 Q8N4P8 Q9BVP2	4	http://www.kegg.jp/kegg-bin/show_pathway?map03008+K14537+K14567+K06943+K14538
map05010	Alzheimer's disease	O43678 B6CGU5 A0A097PY54 O75438	4	http://www.kegg.jp/kegg-bin/show_pathway?map05010+K03946+K04398+K02126+K03957
map04510	Focal adhesion	A0A024R8K7 P08581 O15230 P52735	4	http://www.kegg.jp/kegg-bin/show_pathway?map04510+K06525+K05099+K06240+K05730
map05012	Parkinson's disease	O43678 A0A097PY54 O75438	3	http://www.kegg.jp/kegg-bin/show_pathway?map05012+K03946+K02126+K03957
map04932	Non-alcoholic fatty liver disease (NAFLD)	O43678 B6CGU5 O75438	3	http://www.kegg.jp/kegg-bin/show_pathway?map04932+K03946+K04398+K03957
map05202	Transcriptional misregulation in cancer	F1JVV5 P08581 Q5TEC6	3	http://www.kegg.jp/kegg-bin/show_pathway?map05202+K09053+K05099+K11253
map04142	Lysosome	A0A024R7S3 B4DE67 A8KAQ3	3	http://www.kegg.jp/kegg-bin/show_pathway?map04142+K04645+K01052+K12388
map00190	Oxidative phosphorylation	O43678 A0A097PY54 O75438	3	http://www.kegg.jp/kegg-bin/show_pathway?map00190+K03946+K02126+K03957
map04512	ECM-receptor interaction	A0A024R2W4 A0A024R8K7 O15230	3	http://www.kegg.jp/kegg-bin/show_pathway?map04512+K06265+K06525+K06240
map04151	PI3K-Akt signaling pathway	A0A024R8K7 P08581 O15230	3	http://www.kegg.jp/kegg-bin/show_pathway?map04151+K06525+K05099+K06240
map05168	Herpes simplex infection	B6CGU5 B4DND9 Q09472	3	http://www.kegg.jp/kegg-bin/show_pathway?map05168+K04398+K14840+K04498
map04621	NOD-like receptor signaling pathway	B6CGU5 B1ALI9 B4DT46	3	http://www.kegg.jp/kegg-bin/show_pathway?map04621+K04398+K20910+K08009
map00230	Purine metabolism	H0YNP9 A0A140VJE0	2	http://www.kegg.jp/kegg-bin/show_pathway?map00230+K01139+K00856
map05414	Dilated cardiomyopathy	A0A024R2W4 A0A024R8K7	2	http://www.kegg.jp/kegg-bin/show_pathway?map05414+K06265+K06525
map03013	RNA transport	Q6IAM0 Q9Y6A5	2	http://www.kegg.jp/kegg-bin/show_pathway?map03013+K03248+K14283
map05412	Arrhythmogenic right ventricular cardiomyopathy (ARVC)	A0A024R2W4 A0A024R8K7	2	http://www.kegg.jp/kegg-bin/show_pathway?map05412+K06265+K06525
map05164	Influenza A	A8K7D9 Q09472	2	http://www.kegg.jp/kegg-bin/show_pathway?map05164+K15043+K04498
map05161	Hepatitis B	B6CGU5 Q09472	2	http://www.kegg.jp/kegg-bin/show_pathway?map05161+K04398+K04498
map05152	Tuberculosis	B6CGU5 Q09472	2	http://www.kegg.jp/kegg-bin/show_pathway?map05152+K04398+K04498
map00100	Steroid biosynthesis	B3KRC6 B4DE67	2	http://www.kegg.jp/kegg-bin/show_pathway?map00100+K05917+K01052
map04068	FoxO signaling pathway	Q09472 B2R841	2	http://www.kegg.jp/kegg-bin/show_pathway?map04068+K04498+K06631
map04110	Cell cycle	Q09472 B2R841	2	http://www.kegg.jp/kegg-bin/show_pathway?map04110+K04498+K06631
map05410	Hypertrophic cardiomyopathy (HCM)	A0A024R2W4 A0A024R8K7	2	http://www.kegg.jp/kegg-bin/show_pathway?map05410+K06265+K06525
map05203	Viral carcinogenesis	B6CGU5 Q09472	2	http://www.kegg.jp/kegg-bin/show_pathway?map05203+K04398+K04498
map05206	MicroRNAs in cancer	P08581 Q09472	2	http://www.kegg.jp/kegg-bin/show_pathway?map05206+K05099+K04498
map04520	Adherens junction	P08581 Q09472	2	http://www.kegg.jp/kegg-bin/show_pathway?map04520+K05099+K04498
map05100	Bacterial invasion of epithelial cells	A0A024R7S3 P08581	2	http://www.kegg.jp/kegg-bin/show_pathway?map05100+K04645+K05099
map05211	Renal cell carcinoma	P08581 Q09472	2	http://www.kegg.jp/kegg-bin/show_pathway?map05211+K05099+K04498
map05416	Viral myocarditis	B6CGU5 A0A024R2W4	2	http://www.kegg.jp/kegg-bin/show_pathway?map05416+K04398+K06265
map04144	Endocytosis	A0A024R7S3 P08581	2	http://www.kegg.jp/kegg-bin/show_pathway?map04144+K04645+K05099
map05145	Toxoplasmosis	B6CGU5 O15230	2	http://www.kegg.jp/kegg-bin/show_pathway?map05145+K04398+K06240
map04212	Longevity regulating pathway - worm	B2R4N3 O00767	2	http://www.kegg.jp/kegg-bin/show_pathway?map04212+K13113+K00507
map04024	cAMP signaling pathway	Q09472 P52735	2	http://www.kegg.jp/kegg-bin/show_pathway?map04024+K04498+K05730
map04380	Osteoclast differentiation	B4DT46 C9JCN8	2	http://www.kegg.jp/kegg-bin/show_pathway?map04380+K08009+K09030
map04670	Leukocyte transendothelial migration	B4DT46 P52735	2	http://www.kegg.jp/kegg-bin/show_pathway?map04670+K08009+K05730
map05166	HTLV-I infection	F1JVV5 Q09472	2	http://www.kegg.jp/kegg-bin/show_pathway?map05166+K09053+K04498
map04810	Regulation of actin cytoskeleton	A0A024R8K7 P52735	2	http://www.kegg.jp/kegg-bin/show_pathway?map04810+K06525+K05730
map05230	Central carbon metabolism in cancer	P08581	1	http://www.kegg.jp/kegg-bin/show_pathway?map05230+K05099
map01521	EGFR tyrosine kinase inhibitor resistance	P08581	1	http://www.kegg.jp/kegg-bin/show_pathway?map01521+K05099
map04340	Hedgehog signaling pathway	Q9H5M4	1	http://www.kegg.jp/kegg-bin/show_pathway?map04340+K08958
map04666	Fc gamma R-mediated phagocytosis	P52735	1	http://www.kegg.jp/kegg-bin/show_pathway?map04666+K05730
map03320	PPAR signaling pathway	O00767	1	http://www.kegg.jp/kegg-bin/show_pathway?map03320+K00507
map04210	Apoptosis	B6CGU5	1	http://www.kegg.jp/kegg-bin/show_pathway?map04210+K04398
map00052	Galactose metabolism	Q2M2H8	1	http://www.kegg.jp/kegg-bin/show_pathway?map00052+K12047
map04120	Ubiquitin mediated proteolysis	B2R4U3	1	http://www.kegg.jp/kegg-bin/show_pathway?map04120+K06688
map01524	Platinum drug resistance	B6CGU5	1	http://www.kegg.jp/kegg-bin/show_pathway?map01524+K04398
map04720	Long-term potentiation	Q09472	1	http://www.kegg.jp/kegg-bin/show_pathway?map04720+K04498
map04721	Synaptic vesicle cycle	A0A024R7S3	1	http://www.kegg.jp/kegg-bin/show_pathway?map04721+K04645
map04215	Apoptosis - multiple species	B6CGU5	1	http://www.kegg.jp/kegg-bin/show_pathway?map04215+K04398
map05142	Chagas disease (American trypanosomiasis)	B6CGU5	1	http://www.kegg.jp/kegg-bin/show_pathway?map05142+K04398
map04925	Aldosterone synthesis and secretion	F1JVV5	1	http://www.kegg.jp/kegg-bin/show_pathway?map04925+K09053
map04973	Carbohydrate digestion and absorption	Q2M2H8	1	http://www.kegg.jp/kegg-bin/show_pathway?map04973+K12047
map00564	Glycerophospholipid metabolism	Q92604	1	http://www.kegg.jp/kegg-bin/show_pathway?map00564+K13514
map00627	Aminobenzoate degradation	P07311	1	http://www.kegg.jp/kegg-bin/show_pathway?map00627+K01512
map04214	Apoptosis - fly	B6CGU5	1	http://www.kegg.jp/kegg-bin/show_pathway?map04214+K04398
map04916	Melanogenesis	Q09472	1	http://www.kegg.jp/kegg-bin/show_pathway?map04916+K04498
map04722	Neurotrophin signaling pathway	A8KAQ3	1	http://www.kegg.jp/kegg-bin/show_pathway?map04722+K12388
map04062	Chemokine signaling pathway	P52735	1	http://www.kegg.jp/kegg-bin/show_pathway?map04062+K05730
map04152	AMPK signaling pathway	O00767	1	http://www.kegg.jp/kegg-bin/show_pathway?map04152+K00507
map04014	Ras signaling pathway	P08581	1	http://www.kegg.jp/kegg-bin/show_pathway?map04014+K05099
map05034	Alcoholism	Q5TEC6	1	http://www.kegg.jp/kegg-bin/show_pathway?map05034+K11253
map05169	Epstein-Barr virus infection	Q09472	1	http://www.kegg.jp/kegg-bin/show_pathway?map05169+K04498
map04115	p53 signaling pathway	B6CGU5	1	http://www.kegg.jp/kegg-bin/show_pathway?map04115+K04398
map04145	Phagosome	B4DT46	1	http://www.kegg.jp/kegg-bin/show_pathway?map04145+K08009
map04620	Toll-like receptor signaling pathway	B6CGU5	1	http://www.kegg.jp/kegg-bin/show_pathway?map04620+K04398
map04668	TNF signaling pathway	B6CGU5	1	http://www.kegg.jp/kegg-bin/show_pathway?map04668+K04398
map05322	Systemic lupus erythematosus	Q5TEC6	1	http://www.kegg.jp/kegg-bin/show_pathway?map05322+K11253
map04066	HIF-1 signaling pathway	Q09472	1	http://www.kegg.jp/kegg-bin/show_pathway?map04066+K04498
map04919	Thyroid hormone signaling pathway	Q09472	1	http://www.kegg.jp/kegg-bin/show_pathway?map04919+K04498
map04961	Endocrine and other factor-regulated calcium reabsorption	A0A024R7S3	1	http://www.kegg.jp/kegg-bin/show_pathway?map04961+K04645
map04141	Protein processing in endoplasmic reticulum	A0A0S2Z5K6	1	http://www.kegg.jp/kegg-bin/show_pathway?map04141+K14001
map04360	Axon guidance	P08581	1	http://www.kegg.jp/kegg-bin/show_pathway?map04360+K05099
map04060	Cytokine-cytokine receptor interaction	P08581	1	http://www.kegg.jp/kegg-bin/show_pathway?map04060+K05099
map04622	RIG-I-like receptor signaling pathway	B6CGU5	1	http://www.kegg.jp/kegg-bin/show_pathway?map04622+K04398
map04662	B cell receptor signaling pathway	P52735	1	http://www.kegg.jp/kegg-bin/show_pathway?map04662+K05730
map01212	Fatty acid metabolism	O00767	1	http://www.kegg.jp/kegg-bin/show_pathway?map01212+K00507
map04624	Toll and Imd signaling pathway	B6CGU5	1	http://www.kegg.jp/kegg-bin/show_pathway?map04624+K04398
map04114	Oocyte meiosis	B2R841	1	http://www.kegg.jp/kegg-bin/show_pathway?map04114+K06631
map00970	Aminoacyl-tRNA biosynthesis	H0UI22	1	http://www.kegg.jp/kegg-bin/show_pathway?map00970+K01887
map05134	Legionellosis	B6CGU5	1	http://www.kegg.jp/kegg-bin/show_pathway?map05134+K04398
map01040	Biosynthesis of unsaturated fatty acids	O00767	1	http://www.kegg.jp/kegg-bin/show_pathway?map01040+K00507
map04015	Rap1 signaling pathway	P08581	1	http://www.kegg.jp/kegg-bin/show_pathway?map04015+K05099
map00830	Retinol metabolism	O75911	1	http://www.kegg.jp/kegg-bin/show_pathway?map00830+K11146
map05146	Amoebiasis	O15230	1	http://www.kegg.jp/kegg-bin/show_pathway?map05146+K06240
map05140	Leishmaniasis	B4DT46	1	http://www.kegg.jp/kegg-bin/show_pathway?map05140+K08009
map04310	Wnt signaling pathway	Q09472	1	http://www.kegg.jp/kegg-bin/show_pathway?map04310+K04498
map05205	Proteoglycans in cancer	P08581	1	http://www.kegg.jp/kegg-bin/show_pathway?map05205+K05099
map05222	Small cell lung cancer	O15230	1	http://www.kegg.jp/kegg-bin/show_pathway?map05222+K06240
map04650	Natural killer cell mediated cytotoxicity	P52735	1	http://www.kegg.jp/kegg-bin/show_pathway?map04650+K05730
map00630	Glyoxylate and dicarboxylate metabolism	Q6QN92	1	http://www.kegg.jp/kegg-bin/show_pathway?map00630+K02437
map04350	TGF-beta signaling pathway	Q09472	1	http://www.kegg.jp/kegg-bin/show_pathway?map04350+K04498
map05218	Melanoma	P08581	1	http://www.kegg.jp/kegg-bin/show_pathway?map05218+K05099
map04330	Notch signaling pathway	Q09472	1	http://www.kegg.jp/kegg-bin/show_pathway?map04330+K04498
map05215	Prostate cancer	Q09472	1	http://www.kegg.jp/kegg-bin/show_pathway?map05215+K04498
map05144	Malaria	P08581	1	http://www.kegg.jp/kegg-bin/show_pathway?map05144+K05099
map04664	Fc epsilon RI signaling pathway	P52735	1	http://www.kegg.jp/kegg-bin/show_pathway?map04664+K05730
map00500	Starch and sucrose metabolism	Q2M2H8	1	http://www.kegg.jp/kegg-bin/show_pathway?map00500+K12047
map00260	Glycine, serine and threonine metabolism	Q6QN92	1	http://www.kegg.jp/kegg-bin/show_pathway?map00260+K02437
map04922	Glucagon signaling pathway	Q09472	1	http://www.kegg.jp/kegg-bin/show_pathway?map04922+K04498
map04914	Progesterone-mediated oocyte maturation	B2R841	1	http://www.kegg.jp/kegg-bin/show_pathway?map04914+K06631
map04660	T cell receptor signaling pathway	P52735	1	http://www.kegg.jp/kegg-bin/show_pathway?map04660+K05730
map05120	Epithelial cell signaling in Helicobacter pylori infection	P08581	1	http://www.kegg.jp/kegg-bin/show_pathway?map05120+K05099
map00620	Pyruvate metabolism	P07311	1	http://www.kegg.jp/kegg-bin/show_pathway?map00620+K01512
map04341	Hedgehog signaling pathway - fly	Q9H5M4	1	http://www.kegg.jp/kegg-bin/show_pathway?map04341+K08958
map04630	Jak-STAT signaling pathway	Q09472	1	http://www.kegg.jp/kegg-bin/show_pathway?map04630+K04498

## Sheet: Enrichment
KEGG pathway analysis OXA-treated MKN-45 cells protein functions Enrichment.
Map_ID	Map_Name	Test	TestAll	Ref	RefAll	Test_per	Ref_per	Test_Seq	Ref_Seq	Over_Under	P value	FDR	richFactor
map03010	Ribosome	11	111	122	6210	9.90991	1.96457	P82914 P62269 P63173 H3BMQ2 P62081 P62861 Q6FHK1 P62857 P62273 J3QR09 P83881	P05387 P62888 Q6FG99 P05386 P23396 Q9BTQ7 P30050 P39019 I3L3P7 A8K4W0 M0R210 Q02878 P61513 P62979 D3YTB1 S4R456 E4W6B6 P62280 P08708 P25398 C9K025 P46781 P46783 P62987 Q96IR1 P62269 B3KTM6 A8K4Z4 K7EJT5 P62854 Q8WVC2 P36578 P40429 Q02543 P63173 P62906 P62273 P62857 H7C2W9 P62241 P62277 K7EKI4 P62424 P46779 A0A087WXM6 P15880 P39023 Q53G19 P62750 P18124 P49207 A0A087WV22 C9JNW5 Q9Y2R9 Q07020 P62917…	over	9.63167e-06	0.00104022	0.0901639
map04512	ECM-receptor interaction	3	111	29	6210	2.7027	0.466989	A0A024R2W4 A0A024R8K7 O15230	H0YD13 A0A024R8K7 P23229 P05556 P17301 A5YM53 B4E2B8 P31431 A0A0A0MTS5 P18827 A0A0A1TSG4 Q13751 A0A024RAB6 A0A024R2W4 O75330 B7Z553 B4E0H8 P07996 Q9BUG9 Q8TBN2 A0A024R972 P02751 A0A087X208 D3DPU8 P07942 D3DNA1 O15230 Q13753 B4DH43	over	0.0144869	0.561988	0.103448
map00100	Steroid biosynthesis	2	111	11	6210	1.8018	0.177134	B3KRC6 B4DE67	P37268 Q15738 B3KRC6 P48449 Q3LIE7 Q9NRW5 A8K0D2 B4DE67 B4DHX0 Q15800 Q15125	over	0.0156746	0.561988	0.181818
map05016	Huntington's disease	6	111	121	6210	5.40541	1.94847	A0A024R7S3 O43678 B6CGU5 A0A097PY54 Q09472 O75438	A0A059S4M9 O75947 P14854 C9JFR7 P21796 O14949 P14927 P00441 P18859 Q9UDW1 O95167 O43678 A0A096WXL7 Q9Y277 P22695 P45880 O00483 P06576 Q00610 P13073 P05141 P25705 P12236 P31930 A8K787 A0A087WZX2 C9JLU1 O75489 P48047 P10606 Q13561 Q567R0 P31040 Q5QNZ2 B4DL14 F8WAS3 A0A087WVZ9 H3BPJ9 A0A087WY71 Q07812 O75380 O75438 A0A0C4DFU1 D6R9Z7 P17568 H0UID5 Q9UI09 P21912 O95298 O95168 Q9BTT5 P62875 P56381 P283…	over	0.0208144	0.561988	0.0495868
map03008	Ribosome biogenesis in eukaryotes	4	111	67	6210	3.6036	1.0789	Q13823 Q9BVJ6 Q8N4P8 Q9BVP2	Q96BS4 A0A087X020 Q9NPE3 Q9Y2X3 A8K9K6 P62826 P55769 P78346 P67870 P19784 Q9NX24 E7EU96 K7ESH8 Q9H0A0 Q9NV31 P56537 O14980 A8K6D2 B3KMC9 Q13428 Q12788 O60832 Q9BVP2 E7ETY2 Q8N4P8 Q9BVJ6 F8WC38 Q15061 E9PIN3 A0A0A0MTB8 Q9H089 Q9Y2P8 B3KT11 Q9NY12 Q9NW13 H0YGR4 B2RAX6 A0A087WVD7 B9A008 A8K330 Q9H583 Q969X6 Q8TED0 Q13823 Q9Y3A4 Q05DU1 Q8NB90 Q96F88 A0A0B4J2E5 P78345 Q9BUL9 C9JYM0 Q9UNX4 B3KQ21 A0A0A…	over	0.0313298	0.580913	0.0597015
map05416	Viral myocarditis	2	111	16	6210	1.8018	0.257649	B6CGU5 A0A024R2W4	B4E335 C9JFR7 A0A0S4XQV4 P63000 H0Y3P2 E7EUU4 Q03135 B1PL87 B6CGU5 A8YQF4 N1NSB5 P42574 H3BLV0 A0A024R2W4 A0A0U1RQK7 P10747	over	0.032273	0.580913	0.125
map05202	Transcriptional misregulation in cancer	3	111	47	6210	2.7027	0.756844	F1JVV5 P08581 Q5TEC6	J3KTA4 A0A024R1X8 Q9H4A6 B4E312 B2R6Y1 Q5TEC6 F5H2U8 Q9UH60 P08581 Q59H57 B5BU61 Q9H4A5 Q2TAM5 H3BVD9 A0A0S2Z3D2 G9G6R5 B2R9L6 Q99557 Q9NZQ5 B3KUJ5 B0QYK0 Q96ST3 Q8TAX8 Q9BZE9 C9JWM1 A0A0S2Z470 H3BT57 Q06310 F1JVV5 P19838 H0YG25 Q5T8Z6 C4PGM0 Q03111 B4E1P2 Q59GZ8 Q59GN8 G3XAD2 Q658X7 K7ENH8 A0A088AWL3 F4MH37 H0Y6I7 A8K4M5 O96028 P19532 Q03164	over	0.0510874	0.6254	0.0638298
map05410	Hypertrophic cardiomyopathy (HCM)	2	111	21	6210	1.8018	0.338164	A0A024R2W4 A0A024R8K7	B4E335 P02545 P67936 A8K3K1 P50402 A0A024R8K7 P06753 P23229 F8VYY9 Q13131 P05556 P17301 A5YM53 B4DVP2 B4E2B8 A0A024R2W4 B4E0H8 Q9BUG9 A0A1B0GW58 D3DNA1 C0JYZ2	over	0.053319	0.6254	0.0952381
map05414	Dilated cardiomyopathy	2	111	22	6210	1.8018	0.354267	A0A024R2W4 A0A024R8K7	B4E335 P02545 P67936 A8K3K1 P50402 A0A024R8K7 P06753 P23229 B0AZR9 P17612 P05556 P22694 P17301 A5YM53 B4E2B8 A0A024R2W4 B4E0H8 Q9BUG9 A0A1B0GW58 D3DNA1 O43306 C0JYZ2	over	0.0579826	0.6254	0.0909091
map05412	Arrhythmogenic right ventricular cardiomyopathy (ARVC)	2	111	22	6210	1.8018	0.354267	A0A024R2W4 A0A024R8K7	B4E335 P02545 P35221 A0A024R1X8 P50402 B4DL06 A0A024R8K7 P15924 P23229 Q99959 P05556 Q14126 P26232 P17301 A5YM53 B4E2B8 Q63HM4 A0A024R2W4 B4E0H8 Q9BUG9 A0A1B0GW58 D3DNA1	over	0.0579826	0.6254	0.0909091
map04510	Focal adhesion	4	111	87	6210	3.6036	1.40097	A0A024R8K7 P08581 O15230 P52735	B4E335 O43707 P19105 O75369 A0A024QZN4 A0A0S2Z4N8 A0A0S2Z4I9 P12814 Q9UPN1 P62136 Q13177 A0A0S2Z4I7 B3KR50 B4DJ75 P62834 P60953 B4DHN0 P21333 B4DL06 Q13153 P63000 P61586 A0A024R8K7 Q9Y490 Q03135 P08581 P51636 P23229 P46109 O75116 A0A140T8Z0 B4DFY5 P46108 P05556 P49841 H0Y2Y8 P12931 Q59EF6 H6WA46 P17301 A5YM53 B2RBL9 B4E2B8 E7BSV0 A0A0A0MTS5 Q13418 P31749 B3KVL0 D7RF68 B7Z952 P31751 Q13751 A0A087W…	over	0.0696593	0.6254	0.045977
map04621	NOD-like receptor signaling pathway	3	111	61	6210	2.7027	0.982287	B6CGU5 B1ALI9 B4DT46	P21796 P08238 P43490 P07900 P10599 Q9Y277 Q9Y2Z0 P45880 G8JLD5 B4DHN0 P61586 P60520 M0QXH0 Q8NE86 Q99836 Q6LCB0 B4DL49 I3L1A4 Q2TAM5 B6CGU5 A0A0S2Z3D2 B5BTY5 B2R8K8 P42224 Q6PJD5 B4E0K5 Q7Z434 D3DWY0 Q15750 Q01970 Q14573 Q6AI38 A0A024RBQ5 A6NNK5 Q9UHD2 Q86UT6 E9PIB2 A0A024R3E0 B1ALI9 Q53SV2 B6ETL5 P19838 B5BUB8 M0R205 B4DT46 Q05655 B4DTS8 H0Y4S7 B2R9R2 H0YMG8 Q13546 Q9H6R0 B3KRB7 E7EQA9 B1AMX8 Q9…	over	0.0950796	0.6254	0.0491803
map00627	Aminobenzoate degradation	1	111	6	6210	0.900901	0.0966184	P07311	P30084 P40939 P07311 Q08426 B4DW02 P10696	over	0.102606	0.6254	0.166667
map04380	Osteoclast differentiation	2	111	31	6210	1.8018	0.499195	B4DT46 C9JCN8	B3KR50 B4DHN0 Q14192 P63000 Q13501 B4DFY5 B5BU16 Q2TAM5 B5BTY5 P42224 B4E0K5 D3DWY0 Q15750 P31749 A0A0S2Z3Y4 C9JCN8 P31751 P19838 B5BUB8 B4DT46 P17275 E9PPX2 Q5F2F8 B3KRB7 B1AMX8 Q59GT1 Q00653 P42338 P27986 Q4LDX3 B4DLX6	over	0.105361	0.6254	0.0645161
map05211	Renal cell carcinoma	2	111	33	6210	1.8018	0.531401	P08581 Q09472	E5RHG8 Q13177 B3KR50 P62834 P60953 B4DHN0 Q13153 P63000 P07954 B8ZZU8 A0A024RAV5 P08581 P46109 B4DFY5 P46108 P36507 P01111 B3KVN0 Q06124 Q5T2B5 P31749 D7RF68 P31751 P10398 A6NGV6 A8K724 P62877 Q9NQU5 P42338 P27986 B4DJ05 Q09472 B4DLX6	over	0.116968	0.6254	0.0606061
map04142	Lysosome	3	111	67	6210	2.7027	1.0789	A0A024R7S3 B4DE67 A8KAQ3	Q00610 A0A0G2JLK3 P07602 B3KN68 A0A1B0GW44 Q10567 B4DJQ8 P50897 P09496 Q9BVJ8 B4DL49 I3NI22 P07686 B4DTT0 P20645 E9PIF4 O00203 B3KNH5 G3V2V8 P25774 B2R7M1 P61966 Q14108 G3V126 A8K0B6 B2R4I8 O43747 O14617 Q8NDP0 F8VNT9 H0Y9C7 P16278 B7Z4S8 A0A0G2JNZ5 B4E324 B4DE67 C0LQF2 A0A024R7S3 B4DSE2 Q8NBK3 P27449 A0A024R8Q1 E5RJ52 B3KRY3 O75843 Q14769 B3KR70 Q9UJY5 Q5U000 Q59EZ3 P06280 Q9HBQ7 Q9UJY4 Q14427 B…	over	0.117442	0.6254	0.0447761
map05010	Alzheimer's disease	4	111	105	6210	3.6036	1.69082	O43678 B6CGU5 A0A097PY54 O75438	Q99714 A0A059S4M9 O75947 P14854 C9JFR7 P04406 Q2TSD0 O14949 P14927 P18859 Q9UDW1 O95167 O43678 B2RDW0 A0A096WXL7 P22695 O00483 P06576 P13073 P25705 P31930 Q6IPN0 A0A087WZX2 B4DHN0 O75489 P48047 P10606 Q567R0 P31040 Q5QNZ2 B4DL14 F8WAS3 H3BPJ9 A6XGP7 O75380 O75438 D6R9Z7 P17568 Q9UI09 P21912 P16615 O95298 O95168 A0A024R5A3 Q9BTT5 P56381 P28331 O43920 O14672 P14735 B4DEZ3 P47985 P14406 R4GN43 O7530…	over	0.117994	0.6254	0.0380952
map05144	Malaria	1	111	8	6210	0.900901	0.128824	P08581	A0A0K2BMD8 P08581 Q99836 P60033 B3VL17 P18827 A0A024R3E0 P07996	over	0.134433	0.6254	0.125
map04212	Longevity regulating pathway - worm	2	111	37	6210	1.8018	0.595813	B2R4N3 O00767	P63104 P10809 P27348 B7Z4V2 P31946 P04040 P48506 P09874 P60520 P02795 P04732 A0A0C4DFU1 B4DDK6 B2R4N3 Q16740 B5BU16 B5BTY5 Q9UKK3 H6WA46 B4E0K5 P51610 A0A024R6M2 B4DDM0 O14776 Q9UBS0 P31749 P31751 Q5MIZ7 E9PMQ6 B5BUB8 P42345 Q96EB6 G3V167 F5GWI9 O00767 P42338 B4DLX6	over	0.141061	0.6254	0.0540541
map04520	Adherens junction	2	111	39	6210	1.8018	0.628019	P08581 Q09472	B4E335 O43707 P35221 A0A024QZN4 P12814 P46940 Q96FS1 P60953 B4DHN0 B4DL06 P63000 P61586 P67870 P19784 E7EU96 P08581 B7Z8W3 P18031 O00401 P26232 B2RA70 Q07157 P12931 D3XNU5 E7BSV0 Q9Y6W5 P10586 B4DPS0 Q59F45 B4DWA1 P04626 A8MQ02 Q6SYC2 F5GZI3 Q12913 K7EKE8 B4DH45 O94887 Q09472	over	0.153478	0.6254	0.0512821
map05168	Herpes simplex infection	3	111	78	6210	2.7027	1.25604	B6CGU5 B4DND9 Q09472	C9JFR7 A0A024QZP7 Q07955 P05198 B4DUQ1 A0A0B4J1Z1 Q9UPN1 P62136 E5RJR5 Q13242 B4DJ75 P05114 P84103 A0A024RB10 A0A0S4XQV4 P67870 P19784 E7EU96 E9PB61 Q93009 J3KP15 Q99836 Q59GY3 D3DWK1 Q6LCB0 Q13243 I3L1A4 B7ZKK7 Q2TAM5 B6CGU5 E9PIN3 B4DH52 A8YQF4 N1NSB5 A8K644 A0A0C4DGX4 P42224 A8K651 Q96SB4 Q12962 Q06124 P51610 Q7Z434 D3DWY0 Q59FG7 P42574 Q15750 Q9BRL6 P24928 A0A024RBQ5 B4DHK6 Q9UHD2 H3BT57 Q53T…	over	0.162812	0.6254	0.0384615
map04341	Hedgehog signaling pathway - fly	1	111	11	6210	0.900901	0.177134	Q9H5M4	E5RJR5 P48729 P17612 Q53S54 P49841 A0A0C4DGX4 P22694 C8C069 B3KRV2 Q9H5M4 P62877	over	0.180088	0.6254	0.0909091
map04340	Hedgehog signaling pathway	1	111	12	6210	0.900901	0.193237	Q9H5M4	P48729 P17612 Q53S54 P49841 A0A0C4DGX4 P22694 A8K103 A0A024R8X3 B3KRV2 P25098 Q9Y496 Q9H5M4	over	0.194769	0.6254	0.0833333
map01040	Biosynthesis of unsaturated fatty acids	1	111	12	6210	0.900901	0.193237	O00767	Q53GQ0 P09110 P40939 O00154 Q9NZ01 A0A024R8L7 A0A087X0W7 Q6Y1H2 F5H8G5 H3BPZ1 A0A0A0MTI6 O00767	over	0.194769	0.6254	0.0833333
map00830	Retinol metabolism	1	111	12	6210	0.900901	0.193237	O75911	P00352 P11766 Q8TC12 P19224 Q6NUM9 Q96SQ9 Q8IZV5 E7EMT5 C9IZF6 Q9BTZ2 A0A0A0MR74 O75911	over	0.194769	0.6254	0.0833333
map05145	Toxoplasmosis	2	111	47	6210	1.8018	0.756844	B6CGU5 O15230	C9JFR7 P11142 P0DMV9 B4DHN0 P46734 B5BTZ6 P23229 Q99836 B2R6X6 P34931 P54652 I3L1A4 B5BU16 Q2TAM5 B6CGU5 P05556 A0A0S2Z3D2 B3KSM6 B2R6X5 N1NSB5 B5BTY5 P42224 P08754 B4E0K5 D3DWY0 P42574 A0A0A0MTS5 Q15750 Q9UH51 P31749 P31751 Q13751 P19838 B5BUB8 Q6PIA0 B2R9R2 H7C2I6 B3KRB7 Q59GT1 A0A024R972 P42338 P27986 Q4LDX3 P07942 B4DLX6 O15230 Q13753	over	0.204901	0.6254	0.0425532
map04670	Leukocyte transendothelial migration	2	111	47	6210	1.8018	0.756844	B4DT46 P52735	B4E335 O43707 B2R6J2 P19105 P35221 A0A024QZN4 A0A0S2Z4N8 A0A0S2Z4I9 P12814 A0A0S2Z4I7 P62834 Q96FS1 P60953 B4DL06 P63000 P61586 O75116 B4DLC3 D3DVF0 P05556 O15551 P26232 B5BTY5 B3KW38 P08754 Q06124 B4E0K5 B2RBL9 B2R932 K7EP40 B3KVL0 A0A0U1RQV4 B4DT46 A8MQ02 Q59GN8 Q9NRY4 P05771 P42338 P27986 B4DU18 P19174 A0A0A0MSK6 P52735 A0A169TED2 B4E0W3 B7Z3W6 B4DLX6	over	0.204901	0.6254	0.0425532
map04932	Non-alcoholic fatty liver disease (NAFLD)	3	111	88	6210	2.7027	1.41707	O43678 B6CGU5 O75438	P14854 C9JFR7 O14949 P14927 P05198 Q9UDW1 O95167 O43678 P22695 O00483 P13073 P31930 A0A087WZX2 P60953 O75489 P10606 P63000 Q567R0 P31040 F8WAS3 H3BPJ9 Q07812 O75380 O75438 D6R9Z7 P17568 Q9UI09 P21912 O95298 O95168 Q9BTT5 P28331 O43920 B4DEZ3 P47985 P14406 R4GN43 O75306 F8VYY9 B1PL87 Q13131 P51970 Q2TAM5 Q9UEH5 B7Z7N1 B6CGU5 P49841 P09669 G3V0I5 O43181 Q9NX14 E9PKH6 O14561 Q53SW4 E5E079 H9T3W9 A0A…	over	0.207846	0.6254	0.0340909
map04068	FoxO signaling pathway	2	111	48	6210	1.8018	0.772947	Q09472 B2R841	E9PKG1 P04040 B3KR50 B4DHN0 A0A024RB10 P60520 A0A0C4DFU1 A0A024RAV5 Q9UH60 Q16822 B5BTZ6 Q93009 Q6IB91 F8VYY9 B2R841 B4DFY5 Q13131 P36507 P01111 B5BTY5 P14635 H6WA46 B4DVP2 B4E0K5 Q8WTS6 E7BSV0 B3KRV2 B4DHK6 Q13043 P31749 D7RF68 P31751 Q59F45 Q5U5K4 B5BUB8 P10398 O43521 Q96EB6 F2Z3C8 B3KRB7 Q96RG4 Q59GT1 P42338 P27986 B4DJ05 P55316 Q09472 B4DLX6	over	0.211471	0.6254	0.0416667
map04024	cAMP signaling pathway	2	111	48	6210	1.8018	0.772947	Q09472 P52735	B2RDW0 Q9UPN1 P62136 B4DJ75 P62834 P05023 B4DHN0 Q13153 P63000 C9JVH3 P61586 P05026 Q9UD71 E9PK85 B0AZR9 A0A024R8L7 O75116 P17612 B4DFY5 Q2TAM5 P36507 D6R938 P54709 P08754 P22694 B3KW93 P10301 Q5SWX3 P31749 D7RF68 P31751 A0A024RBC7 P19838 Q13733 B2RAH5 A0A0U1RQV4 B5BUB8 B2RAH2 A8MQ02 B4DI77 Q59GY6 P42338 P27986 B7Z905 P52735 O43306 Q09472 B4DLX6	over	0.211471	0.6254	0.0416667
map05200	Pathways in cancer	4	111	135	6210	3.6036	2.17391	B6CGU5 P08581 O15230 Q09472	E5RHG8 C9JFR7 Q9UBI6 P08238 P07900 P35221 A0A024R1X8 Q5CAQ5 Q2MJK0 B3KR50 A0A024QZJ7 P60953 B4DHN0 B4DL06 A0A024RB10 P63000 P61586 P06753 P62879 B2R6K4 Q07812 P07954 B8ZZU8 P11234 A0A024RAV5 P11233 Q9UH60 P08581 B5BTZ6 P23229 B5BU61 P12270 B0AZR9 Q13363 P46109 Q92888 O75116 Q6LCB0 B1PL87 P17612 Q7Z426 P43246 B4DFY5 P46108 Q00534 P63218 Q2TAM5 P36507 P52701 B6CGU5 P05556 A0A0S2Z3D2 P49841 P01111 P…	over	0.221467	0.6254	0.0296296
map05100	Bacterial invasion of epithelial cells	2	111	50	6210	1.8018	0.805153	A0A024R7S3 P08581	B4E335 O15511 P35221 Q15019 A0A024QZN4 Q00610 Q14247 Q9UHD8 Q9Y5K6 P60953 B4DL06 P63000 P61586 O15144 Q9BPX5 Q03135 P59998 P08581 B2R4D5 P51636 P50570 D6RGI3 P46109 P84095 P09496 P46108 B7ZVZ1 P05556 O00401 P26232 O15143 B4DPT4 P12931 D3XNU5 B2RBL9 A0A024R7S3 Q13418 Q9Y6W5 Q53GB6 B3KVL0 Q96BJ8 B4DL02 Q59GN8 Q9ULV8 P02751 P42338 P27986 A1A4S6 B4DLX6 B2RUU3	over	0.22467	0.6254	0.04
map04060	Cytokine-cytokine receptor interaction	1	111	15	6210	0.900901	0.241546	P08581	P08581 E7BSV0 C8C069 B7Z588 A0A024R3E0 Q53SF4 P32970 Q9UBN6 F8U8C0 K9J972 B2RA14 Q8IVS6 Q96F46 Q59FR5 Q59EG2	over	0.237269	0.6254	0.0666667
map04330	Notch signaling pathway	1	111	15	6210	0.900901	0.241546	Q09472	B5BU61 A0A024R6E3 Q13363 P56545 B3KUJ5 B4DJN0 A0A024R9Q8 P78536 A0A024R684 Q8TDB6 B2R6U9 Q75MM6 B4E2D6 C9J7T7 Q09472	over	0.237269	0.6254	0.0666667
map05152	Tuberculosis	2	111	53	6210	1.8018	0.853462	B6CGU5 Q09472	P51149 P10809 C9JFR7 B7Z4V2 P51148 P20339 B2RDW0 P61020 B4DHN0 P61586 Q07812 A0A1B0GW44 Q99836 Q6LCB0 B1PL87 A0A087WWW9 Q2TAM5 B6CGU5 Q99557 D6R938 P25774 B2R7M1 N1NSB5 G3V126 B5BTY5 P42224 P12931 M0R308 F8VNZ0 B4E0K5 P42574 Q5SWX3 P27449 Q15075 B3KRY3 P31749 B3KR70 P31751 A0A024R3E0 P19838 B5BUB8 Q9UG77 F8VSL3 Q5F2F8 H7C2I6 Q13952 B4DGW2 Q53ET5 H0YCG2 A8K5S1 Q4LDX3 Q09472 P01024	over	0.244579	0.6254	0.0377358
map05012	Parkinson's disease	3	111	97	6210	2.7027	1.562	O43678 A0A097PY54 O75438	P68036 A0A059S4M9 O75947 P14854 C9JFR7 P21796 O14949 P14927 P18859 Q9UDW1 Q99497 O95167 O43678 A0A096WXL7 Q9Y277 P22695 P45880 O00483 P06576 P13073 P05141 P25705 P12236 P31930 A8K787 A0A087WZX2 P22314 O75489 P48047 P10606 Q567R0 P31040 Q5QNZ2 B4DL14 F8WAS3 H3BPJ9 O75380 O75438 D6R9Z7 P17568 Q9UI09 P21912 O95298 O95168 Q9BTT5 P56381 P28331 O43920 B4DEZ3 P47985 P14406 B2R6X6 R4GN43 O75306 Q14WI3 P1…	over	0.250474	0.6254	0.0309278
map04973	Carbohydrate digestion and absorption	1	111	16	6210	0.900901	0.257649	Q2M2H8	P05023 P05026 E9PB90 B3KT70 P54709 B4DG62 B3KW93 P31749 P31751 Q13733 Q2M2H8 B4DPL8 P05771 P42338 P27986 B4DLX6	over	0.250935	0.6254	0.0625
map00190	Oxidative phosphorylation	3	111	98	6210	2.7027	1.5781	O43678 A0A097PY54 O75438	A0A059S4M9 O75947 P14854 Q15181 P56385 Q14061 O14949 P14927 P18859 Q9UDW1 O95167 O43678 A0A096WXL7 P22695 O00483 P06576 P13073 P25705 P31930 P38606 E9PN17 A0A087WZX2 Q16864 O75489 P48047 P10606 Q567R0 P21283 P31040 Q5QNZ2 B4DL14 F8WAS3 H3BPJ9 P36543 P21281 O75380 O75438 D6R9Z7 P17568 Q9UI09 P21912 O75348 O95298 O95168 Q9BTT5 Q9H2U2 P56381 P28331 O43920 B4DEZ3 P47985 P14406 R4GN43 O75306 Q14WI3 P5…	over	0.255297	0.6254	0.0306122
map04151	PI3K-Akt signaling pathway	3	111	98	6210	2.7027	1.5781	A0A024R8K7 P08581 O15230	P62258 P63104 P27348 Q04917 Q9UBI6 P08238 P31946 P07900 P67775 P61981 B4DDF7 Q5CAQ5 B3KR50 B4DHN0 A0A024RB10 P63000 P62753 A0A024R8K7 P62879 Q16543 B2R6K4 B4DEP6 A0A024RAV5 Q9UH60 P08581 Q16822 P06730 P23229 Q6IB91 A8K005 Q16513 B4DFY5 Q00534 P63218 Q13131 H6TXS1 Q2TAM5 P36507 P05556 A0A0S2Z3D2 P49841 A8K6K7 P30154 P01111 P29317 Q59EF0 Q96L51 C9JEL3 Q86XZ2 H6WA46 P17301 A5YM53 D3DWY0 B4DDM0 B4E2B…	over	0.255297	0.6254	0.0306122
map00630	Glyoxylate and dicarboxylate metabolism	1	111	17	6210	0.900901	0.273752	Q6QN92	Q75MT9 A0A024RB99 P04040 P40925 P24752 A0A0K0K1H7 Q9BWD1 B4DJV2 D3DXC9 B4DFL1 Q9UBQ7 A6NDG6 B2R6K1 P21399 Q6QN92 E9PEC3 P15104	over	0.264359	0.6254	0.0588235
map04624	Toll and Imd signaling pathway	1	111	18	6210	0.900901	0.289855	B6CGU5	P61088 P46734 Q15819 Q99836 Q13404 Q6LCB0 B6CGU5 B5BTY5 B4E0K5 A0A0A0MQU3 P19838 A8K9X5 B5BUB8 B4E1P2 Q12955 H7C2I6 B3KRB7 P16157	over	0.277544	0.6254	0.0555556
map05140	Leishmaniasis	1	111	18	6210	0.900901	0.289855	B4DT46	B4DHN0 Q99836 I3L1A4 Q2TAM5 P05556 N1NSB5 B5BTY5 P49006 P42224 B4E0K5 Q15750 B4DPS0 P19838 B4DT46 H7C2I6 P05771 Q4LDX3 P01024	over	0.277544	0.6254	0.0555556
map00500	Starch and sucrose metabolism	1	111	18	6210	0.900901	0.289855	Q2M2H8	Q59GM9 P11216 P36871 B4DE36 A0A087WYS1 E9PB90 B3KT70 A8K6K7 Q96G03 C9JQ42 B4DG62 B4DRW6 Q6PCE3 A0A024R8Q1 E9PK47 Q2M2H8 B4DUF1 A0A0M4G3H8	over	0.277544	0.6254	0.0555556
map00052	Galactose metabolism	1	111	19	6210	0.900901	0.305958	Q2M2H8	P36871 Q01813 A0A087WYS1 Q96C23 E9PB90 B3KT70 P15121 Q14376 P08237 P17858 Q96G03 B4DG62 P51570 O60218 P16278 A0A024R8Q1 B4DLB8 P06280 Q2M2H8	over	0.290495	0.6254	0.0526316
map04215	Apoptosis - multiple species	1	111	19	6210	0.900901	0.305958	B6CGU5	C9JFR7 Q502X2 Q07812 Q6LCB0 B1PL87 B6CGU5 A0A0S2Z3D2 F8VNZ0 P42574 A3E0Z5 B5BUB8 B3KRK7 O43521 Q6PIA0 B2R9R2 A0A0C4DG44 K7ELY9 Q9BXH1 Q9NR09	over	0.290495	0.6254	0.0526316
map04925	Aldosterone synthesis and secretion	1	111	19	6210	0.900901	0.305958	F1JVV5	B2RDW0 B0AZR9 P17612 D6R938 P22694 Q5SWX3 Q9UH51 Q01970 Q14573 F1JVV5 B7ZKQ9 A0A024QZX9 P05771 Q9BZL6 A0A169TED2 Q6AZW6 B7Z3W6 Q14571 O43306	over	0.290495	0.6254	0.0526316
map05218	Melanoma	1	111	19	6210	0.900901	0.305958	P08581	Q2MJK0 B4DHN0 A0A024RAV5 P08581 B4DFY5 Q00534 P36507 P01111 H6WA46 D3XNU5 E7BSV0 B4DTN0 P31749 D7RF68 P31751 P10398 P42338 P27986 B4DLX6	over	0.290495	0.6254	0.0526316
map00260	Glycine, serine and threonine metabolism	1	111	19	6210	0.900901	0.305958	Q6QN92	P18669 A0A024RB99 Q9Y617 C9JBI3 P50440 A0A1B0GTG2 O43175 D3DXC9 B4DFL1 Q9UBQ7 P32929 H0YID3 Q14353 A0A024R301 P21397 B7Z242 B7Z6W5 Q6QN92 B4DDG9	over	0.290495	0.6254	0.0526316
map05161	Hepatitis B	2	111	60	6210	1.8018	0.966184	B6CGU5 Q09472	P63104 P12004 C9JFR7 R4GMU8 P27348 P31946 A0A0D9SFB3 Q9Y277 B3KR50 B4DHN0 A0A024RB10 Q16531 Q07812 A0A024RAV5 Q9UH60 B5BTZ6 Q99836 Q6LCB0 B4DFY5 Q00534 Q2TAM5 P36507 B6CGU5 Q92466 P01111 P42224 P12931 B4DH44 H6WA46 F8VNZ0 Q7Z434 D3DWY0 P42574 B4DTN0 A3E0Z5 P31749 B3KR70 Q9UHD2 P31751 A0A024RAB6 P19838 B5BUB8 M0R205 Q9BQD2 P20248 B3KRB7 Q53TB6 K9J972 Q59GT1 P05771 P42338 P27986 Q4LDX3 A0A169TED2 Q…	over	0.291204	0.6254	0.0333333
map04350	TGF-beta signaling pathway	1	111	21	6210	0.900901	0.338164	Q09472	P67775 B4DDF7 E5RJR5 B4DHN0 P61586 P30154 Q5JSB5 A0A0C4DGX4 B4DDM0 C8C069 Q9UBS0 Q53SF4 Q59F45 A0A0U1RQV4 C4PGM0 P07996 P62877 H7C0I7 A0A024RAL3 Q16254 Q09472	over	0.315711	0.6254	0.047619
map05206	MicroRNAs in cancer	2	111	65	6210	1.8018	1.0467	P08581 Q09472	H3BPC4 P36952 B2R6J2 B4DUQ1 B5BU83 Q2MJK0 B3KR50 H0YD13 P61586 P35241 Q9NZI8 Q16678 A0A024RAV5 F5H2U8 Q9UH60 P08581 B5BTZ6 G3V5A9 P46109 B4DFY5 P46108 Q00534 Q96FF9 H6TXS1 P36507 P29966 H7BYN4 P01111 P26358 A8K132 H6WA46 I3L4X2 P42574 E7BSV0 B2RAF9 P19838 A0A0U1RQV4 P42345 P04626 B3KRK7 B4DKX4 O43521 Q5T8Z6 Q96EB6 Q9P119 P07996 Q07820 A8K724 B2R728 B4DL02 Q59GZ8 B3KRB7 Q96RG4 Q658X7 P05771 Q8N122…	over	0.324338	0.6254	0.0307692
map04630	Jak-STAT signaling pathway	1	111	22	6210	0.900901	0.354267	Q09472	B3KR50 B5BTZ6 A0A0S2Z3D2 P42224 Q06124 P31749 P31751 B4DPS0 P42345 B2RAY1 Q9BQD2 Q07820 O75886 Q1XBU8 P42338 P27986 Q4LDX3 Q59EG2 K7EK35 B4DJ05 Q09472 B4DLX6	over	0.327983	0.6254	0.0454545
map04916	Melanogenesis	1	111	23	6210	0.900901	0.37037	Q09472	B2RDW0 B4DHN0 B4DL06 A0A024RAV5 B0AZR9 P17612 B4DFY5 P36507 P49841 D6R938 P01111 P08754 P22694 Q5SWX3 Q01970 B4E236 B4E2D6 P05771 A0A169TED2 B7Z3W6 O75084 O43306 Q09472	over	0.340038	0.6254	0.0434783
map04961	Endocrine and other factor-regulated calcium reabsorption	1	111	23	6210	0.900901	0.37037	A0A024R7S3	Q00610 P05023 P05026 A0A087WY71 H0UID5 P50570 B0AZR9 O95782 P09496 P17612 P53680 P54709 P22694 B3KW93 A0A024R7S3 Q01970 B7Z5S9 P05937 Q13733 P05771 A0A169TED2 B7Z3W6 O43306	over	0.340038	0.6254	0.0434783
map04721	Synaptic vesicle cycle	1	111	24	6210	0.900901	0.386473	A0A024R7S3	P54920 Q00610 P38606 Q16864 P21283 P36543 A0A087WY71 B7Z5J7 P21281 H0UID5 O75348 P50570 J3QRU4 O95782 P09496 P53680 G3V2S6 B2R7M1 G3V126 A0A024R7S3 P27449 B7Z5S9 A0A0C4DGE4 Q53ET5	over	0.351878	0.6254	0.0416667
map05322	Systemic lupus erythematosus	1	111	24	6210	0.900901	0.386473	Q5TEC6	O43707 P06899 A8K9J7 B5BUB5 P62805 O75367 P12814 P62318 Q96KK5 B2R5B6 Q96A08 Q5XPV6 B2R6Y1 Q5TEC6 P0C0S5 P16104 P10155 Q9P0M6 N1NSB5 J3QLI9 P10747 B7Z1F8 P19474 P01024	over	0.351878	0.6254	0.0416667
map04664	Fc epsilon RI signaling pathway	1	111	24	6210	0.900901	0.386473	P52735	B3KR50 B4DHN0 P63000 P46734 A0A024RAV5 B4DFY5 B5BU16 P36507 P01111 B5BTY5 B4DH44 B4E0K5 B4DQ79 P31749 P31751 B5BUB8 P42338 P27986 P19174 P52735 A0A169TED2 A8K2S1 B4DJ05 B4DLX6	over	0.351878	0.6254	0.0416667
map04110	Cell cycle	2	111	70	6210	1.8018	1.12721	Q09472 B2R841	P62258 P63104 P12004 P27348 A0A024QZP7 Q04917 P31946 P31947 P61981 B2R7C5 E5RJR5 Q2MJK0 B2RBA6 A0A024RB10 A0A140VJF3 Q4ZG57 P49736 P33992 A0A024R7U6 B0AZQ4 Q14683 Q9UH60 B5BU61 P78527 B2R841 Q13257 Q00534 P49841 O60216 B3KMP2 Q5JSB5 A0A0C4DGX4 Q8N3U4 B3KUJ5 Q5T8C6 Q6AI02 P14635 A8K7H4 Q9Y6D9 Q8NHZ8 B4E014 B4DTN0 B4DHK6 Q9UDM8 O75419 Q12834 Q59F45 Q9UJX2 H3BT22 J3KN87 B4DYU9 B4DL80 Q9UJX6 Q9H1A4 H…	over	0.35708	0.6254	0.0285714
map03320	PPAR signaling pathway	1	111	25	6210	0.900901	0.402576	O00767	P07108 Q01469 P09110 P50416 Q16822 Q6IB91 B2R761 Q08426 A0A024R8L7 B3KN05 Q9ULC5 O60488 B4E0R0 A0A1B0GTB8 B4DWX6 A8MW49 P02656 O14975 Q13418 Q06310 B3KNH1 F8W696 O00767 B4DH45 B7Z3U1	over	0.363508	0.6254	0.04
map05164	Influenza A	2	111	71	6210	1.8018	1.14332	A8K7D9 Q09472	B4E335 C9JFR7 P21796 P11142 P05198 P0DMV9 Q14258 P25685 B4DHN0 Q13838 A0A024R0J9 A8K7D9 Q13217 Q59EC0 P46734 O14980 P78406 A0A024DAK3 Q99836 P34931 P54652 B4DFY5 C9JEV9 I3L1A4 B7ZKK7 B5BU16 Q2TAM5 P36507 E9PIN3 P49841 P14324 B3KSM6 B2R6X5 P52294 N1NSB5 B4DHC5 B5BTY5 P42224 B4DH44 B4E0K5 Q7Z434 P52948 Q86U42 P07477 A0A024RBQ5 P31749 B7Z588 Q9UHD2 Q86UT6 P31751 A0A024R3E0 H3BT57 P19838 B5BUB8 M0R20…	over	0.363565	0.6254	0.028169
map04720	Long-term potentiation	1	111	26	6210	0.900901	0.41868	Q09472	B2RDW0 Q9UPN1 P62136 B4DJ75 P62834 B4DHN0 A0A024RAV5 P51812 P17612 B4DFY5 P36507 E9PGT3 D6R938 P01111 P22694 Q5SWX3 Q01970 Q14573 D7RF68 P10398 Q5F2F8 P05771 A0A169TED2 B7Z3W6 Q14571 Q09472	over	0.374931	0.6254	0.0384615
map04622	RIG-I-like receptor signaling pathway	1	111	26	6210	0.900901	0.41868	B6CGU5	A0A0D9SFB3 K7EN45 Q14258 P05161 A0A024R529 Q6LCB0 I3L1A4 Q2TAM5 B6CGU5 B5BTY5 B4E0K5 Q7Z434 D3DWY0 Q9UHD2 Q86UT6 P19838 B5BUB8 M0R205 Q13546 B3KRB7 E7EQA9 B1AMX8 Q53TB6 H7BZQ3 Q59GT1 Q13233	over	0.374931	0.6254	0.0384615
map04115	p53 signaling pathway	1	111	27	6210	0.900901	0.434783	B6CGU5	C9JFR7 A0A024QZP7 P36952 P31947 P31350 Q2MJK0 A0A024RB10 Q07812 Q7LG56 B1PL87 Q00534 B6CGU5 Q92466 B4DMQ7 O14681 P14635 H6WA46 F8VNZ0 P42574 J3KN87 P07996 Q658P3 K9J972 Q9BXH1 Q13535 A0A024R4V8 X5D7Q2	over	0.386151	0.6254	0.037037
map05134	Legionellosis	1	111	29	6210	0.900901	0.466989	B6CGU5	Q9H0U4 P10809 C9JFR7 P62820 P11142 P55072 P0DMV9 P26641 P68104 Q9NR31 O75396 Q05639 Q99836 P34931 Q53F37 P54652 Q2TAM5 B6CGU5 B3KSM6 B2R6X5 B7Z524 F8VNZ0 P42574 A0A024R3E0 P19838 E9PMQ6 B7Z238 Q00653 P01024	over	0.407995	0.6254	0.0344828
map05142	Chagas disease (American trypanosomiasis)	1	111	30	6210	0.900901	0.483092	B6CGU5	Q53G71 P67775 B4DDF7 B4DHN0 Q99836 B0AZR9 Q6LCB0 Q2TAM5 B6CGU5 P30154 B5BTY5 P08754 B4DH44 B4E0K5 D3DWY0 Q01970 P31749 P31751 P63151 Q59F45 P19838 B5BUB8 H7C2I6 B3KRB7 K9J972 Q59GT1 P42338 P27986 B4DLX6 P01024	over	0.418626	0.6254	0.0333333
map04214	Apoptosis - fly	1	111	30	6210	0.900901	0.483092	B6CGU5	C9JFR7 P20700 Q13162 P55010 P20290 Q03252 B4DF70 G8JLD5 B4DHN0 P09874 O95831 A0A024RAV5 B6CGU5 E9PL10 Q6MZZ4 Q9UKK3 B1AH87 F8VNZ0 E7BSV0 Q6AI38 D7RF68 Q13188 B5BUB8 B2R9R2 G3V167 H7BXZ6 A0A0C4DG44 Q13535 Q9NR09 C9J185	over	0.418626	0.6254	0.0333333
map04620	Toll-like receptor signaling pathway	1	111	30	6210	0.900901	0.483092	B6CGU5	B4DHN0 P63000 P46734 Q99836 Q6LCB0 B4DFY5 B5BU16 Q2TAM5 P36507 B6CGU5 B5BTY5 P42224 E9PNS3 B4DH44 B4E0K5 D3DWY0 Q15750 P31749 Q9UHD2 P31751 P19838 B5BUB8 M0R205 Q13546 H7C2I6 B3KRB7 Q59GT1 P42338 P27986 B4DLX6	over	0.418626	0.6254	0.0333333
map00620	Pyruvate metabolism	1	111	30	6210	0.900901	0.483092	P07311	Q75MT9 P14618 A0A024R5Z9 P00338 P05091 P07195 P40925 P24752 Q04760 A0A1B0GTG2 P51648 P30837 P07954 P11177 Q9BWD1 Q16822 P07311 Q6IB91 P08559 P23368 B4DFL1 Q9UBQ7 A8K168 A0A024R0Y2 B4DJX1 P49189 B2R673 H0UIA1 P11498 Q86WU2	over	0.418626	0.6254	0.0333333
map04662	B cell receptor signaling pathway	1	111	31	6210	0.900901	0.499195	P52735	B3KR50 B4DHN0 P63000 A0A024RAV5 B4DFY5 I3L1A4 A0A087WWW9 Q2TAM5 P36507 H7BYV1 P60033 P49841 P01111 D3DWY0 B4DQ79 P31749 P31751 B4DPS0 P19838 A0A0A0MTP6 Q5F2F8 B4DW38 B3KRB7 Q59GT1 P05771 A8K5S1 P42338 P27986 P52735 B4DJ05 B4DLX6	over	0.429068	0.6254	0.0322581
map05146	Amoebiasis	1	111	32	6210	0.900901	0.515298	O15230	P51149 O43707 P51148 P20339 A0A024QZN4 B4E3A8 P12814 P61020 P35237 P04792 B0AZR9 P17612 Q2TAM5 P22694 P42574 A0A0A0MTS5 Q01970 Q13751 P19838 Q59GN8 P05771 A0A024R972 P02751 P42338 P27986 A0A169TED2 B7Z3W6 P07942 B4DLX6 O15230 Q13753 B4DH43	over	0.439324	0.6254	0.03125
map04650	Natural killer cell mediated cytotoxicity	1	111	32	6210	0.900901	0.515298	P52735	B3KR50 B4DHN0 A0A0S4XQV4 Q13153 P63000 A0A024RAV5 B1PL87 B4DFY5 P36507 A8YQF4 P01111 Q06124 P42574 B7Z588 D7RF68 A0A0S2Z3Y4 B4DPS0 P10398 Q5F2F8 B4DL02 Q9UBN6 F8U8C0 K9J972 P05771 P42338 P27986 P19174 P52735 A0A169TED2 B7Z3W6 B4DJ05 B4DLX6	over	0.439324	0.6254	0.03125
map05215	Prostate cancer	1	111	32	6210	0.900901	0.515298	Q09472	P08238 P07900 Q5CAQ5 B3KR50 B4DHN0 B4DL06 A0A024RB10 A0A024RAV5 Q9UH60 B4DFY5 Q2TAM5 P36507 P49841 P01111 H6WA46 D3DWY0 E7BSV0 B4DTN0 P31749 D7RF68 P31751 P19838 P42345 P04626 P10398 B3KRB7 Q59GT1 P42338 P27986 B4DJ05 Q09472 B4DLX6	over	0.439324	0.6254	0.03125
map01212	Fatty acid metabolism	1	111	33	6210	0.900901	0.531401	O00767	P30084 Q53GQ0 P55084 A0A0G2JLK3 B2RB23 P24752 P09110 P49748 P40939 P49327 Q16836 P50416 Q9BWD1 P45954 Q08426 P50897 Q9NZ01 A0A024R8L7 B3KN05 Q9ULC5 O60488 A0A024R0Y2 D4QEZ8 B4E0R0 A0A1B0GTB8 B4DWX6 Q8IVS2 Q6Y1H2 F5H8G5 H3BPZ1 B4DV18 A0A0A0MTI6 O00767	over	0.449398	0.6254	0.030303
map05230	Central carbon metabolism in cancer	1	111	35	6210	0.900901	0.563607	P08581	P14618 A0A024R5Z9 P18669 Q2Q9H2 Q2VF42 Q01813 B4DHN0 Q9NQ88 P11177 A0A024RAV5 E9PB90 B3KT70 P08581 P08237 P08559 B4DFY5 P36507 P17858 Q15758 P01111 A8K132 B4DG62 B3KVN0 H6WA46 B7Z5U1 E7BSV0 P31749 O15427 P31751 Q01650 P42345 P04626 P42338 P27986 B4DLX6	over	0.46901	0.6254	0.0285714
map05166	HTLV-I infection	2	111	91	6210	1.8018	1.46538	F1JVV5 Q09472	P12004 P21796 Q53G71 Q9Y277 P45880 P05141 P12236 Q2MJK0 P27824 A8K787 P62826 B4DL06 A0A140VJF3 P43487 A0A0S4XQV4 Q9Y490 Q07812 A0A024RAV5 O14980 E9PK85 B7Z7F3 P17612 Q13257 B4DYZ7 Q2TAM5 A0A0S2Z3D2 P49841 P14324 A8YQF4 B4DP28 B3KMP2 N1NSB5 P01111 B3KVN0 Q5T8C6 P22694 B4DH44 B1AH87 D3DWY0 P10301 Q8NHZ8 Q9NRF9 P28340 B4DMP4 B4DTN0 P31749 A0A0S2Z3Y4 P31751 A0A0C4DFT3 Q9NR33 Q12834 F1JVV5 Q59F45 Q9UJ…	over	0.486867	0.6254	0.021978
map01521	EGFR tyrosine kinase inhibitor resistance	1	111	37	6210	0.900901	0.595813	P08581	B3KR50 B4DHN0 P62753 Q07812 A0A024RAV5 P08581 B5BTZ6 P06730 B4DFY5 P36507 A0A0S2Z3D2 P49841 P01111 P12931 C9JEL3 H6WA46 B4DDM0 E7BSV0 Q9UBS0 P31749 D7RF68 P31751 P42345 P04626 P10398 O43521 B4DL02 H0Y465 P05771 P42338 P27986 P19174 Q4LDX3 A0A169TED2 B7Z3W6 B4DJ05 B4DLX6	over	0.48793	0.6254	0.027027
map00564	Glycerophospholipid metabolism	1	111	37	6210	0.900901	0.595813	Q92604	O95372 P49585 A0A087X1K9 Q99447 Q8N335 B4DYR5 Q53T76 B3KSW0 F5H0M4 O15120 Q8NF37 Q643R3 Q9BSY0 Q53EU6 B3KM95 Q92604 P23743 Q92903 Q8IV08 B1AKM8 K7ENH4 H0Y6T3 Q6NUM7 Q68CS2 B4DDH8 Q7Z5X8 Q659C5 A0A024R5E0 A0A0C4DGS9 Q7L5N7 B4DLU3 B4DUA6 Q59FU4 B7Z905 Q8IY17 A8K2S1 Q6ZNC8	over	0.48793	0.6254	0.027027
map04668	TNF signaling pathway	1	111	37	6210	0.900901	0.595813	B6CGU5	G8JLD5 B4DHN0 P46734 Q8NB16 Q6LCB0 Q96HS1 B4DFY5 B5BU16 Q2TAM5 B6CGU5 Q99557 B5BTY5 B4DH44 B4E0K5 D3DWY0 P42574 Q15750 P31749 P31751 Q96J02 P19838 B5BUB8 P17275 B2RA34 Q13546 B3KRB7 B1AMX8 K9J972 Q59GT1 Q8IVS6 F6SS63 P42338 P27986 Q6AZW6 B2R6P3 O75582 B4DLX6	over	0.48793	0.6254	0.027027
map05222	Small cell lung cancer	1	111	38	6210	0.900901	0.611916	O15230	C9JFR7 A0A024RB10 P23229 Q00534 Q2TAM5 P05556 A0A0S2Z3D2 H6WA46 P17301 A5YM53 F8VNZ0 D3DWY0 Q8TAX8 A0A0A0MTS5 B4DTN0 B4DHK6 Q5T179 P31749 P31751 Q13751 Q06310 P19838 B4E0H8 Q6PIA0 B2R9R2 Q59GN8 B3KRB7 B1AMX8 Q59GT1 A0A024R972 P02751 P42338 P27986 P07942 B4DLX6 O15230 Q13753 B4DH43	over	0.497138	0.6254	0.0263158
map04660	T cell receptor signaling pathway	1	111	38	6210	0.900901	0.611916	P52735	Q13177 B3KR50 P60953 B4DHN0 Q13153 P61586 A0A024RAV5 B4DFY5 I3L1A4 A0A087WWW9 Q2TAM5 P36507 P49841 P01111 B5BTY5 B4E0K5 D3DWY0 P31749 A0A0S2Z3Y4 P31751 A0A0C4DFT3 B4DPS0 P19838 P10747 A8K724 Q5F2F8 B3KRB7 Q53TG4 Q9ULV8 Q59GT1 Q9NQU5 A8K5S1 P42338 P27986 P19174 P52735 B4DJ05 B4DLX6	over	0.497138	0.6254	0.0263158
map05120	Epithelial cell signaling in Helicobacter pylori infection	1	111	38	6210	0.900901	0.611916	P08581	P38606 P60953 Q16864 Q13153 P63000 P21283 P36543 P21281 O75348 P08581 O14672 D3DVF0 Q2TAM5 G3V2S6 B2R7M1 G3V126 B5BTY5 A0A0C4DGN6 Q07157 P12931 B4DH44 Q06124 B4E0K5 D3DWY0 P42574 E7BSV0 A8K3B6 P27449 B4DQ79 B3KR70 P78536 P19838 B5BUB8 B3KRB7 Q53ET5 Q59GT1 P19174 Q9Y239	over	0.497138	0.6254	0.0263158
map00230	Purine metabolism	2	111	93	6210	1.8018	1.49758	H0YNP9 A0A140VJE0	P14618 Q32Q12 A0A024R5Z9 P31939 P00491 P15531 P00492 P49915 P00568 P31350 F8W1A4 P36871 P11908 P60891 H0Y4R1 X6RM59 C9JLU1 P22102 Q7Z4Y4 B4E1L0 P50583 Q9UKK9 A0A087WVZ9 P22234 Q9Y2S0 Q9BY32 H3BQB1 P62875 Q8TCS8 A0A1B0GTJ7 A0A024R6B4 H0YMB3 B4DNN4 Q7LG56 B7Z377 Q9Y2T3 B4DYZ7 P27144 Q8TCD5 A0A024R725 B4DH29 P62487 B4DP28 Q96HT3 Q06203 Q96G03 Q9NUF9 B4DIZ6 D6RCP9 Q9H9Y6 A0A087WVD7 A8K7A0 K7EN15 Q587…	over	0.498394	0.6254	0.0215054
map04810	Regulation of actin cytoskeleton	2	111	93	6210	1.8018	1.49758	A0A024R8K7 P52735	G3V1A4 P07737 C9J0J7 B4E335 O43707 B2R6J2 Q9UBI6 P19105 O15511 Q8WUW1 A0A024QZN4 P12814 Q9UPN1 P62136 Q13177 B4DJ75 P46940 P60953 B4DHN0 Q13153 P63000 P61586 A0A024R8K7 P35241 O15144 Q9BPX5 P59998 A0A024RAV5 B2R4D5 P23229 E9PK85 Q7L576 P46109 Q92888 Q9Y281 O75116 A0A140T8Z0 B4DFY5 P46108 Q9Y2A7 P36507 P05556 B7Z992 Q8TBX8 O00401 P01111 A0A024RAJ8 A0A0C4DGN6 O15143 P12931 P17301 A5YM53 E7EVJ5 B2RB…	over	0.498394	0.6254	0.0215054
map01524	Platinum drug resistance	1	111	40	6210	0.900901	0.644122	B6CGU5	C9JFR7 P09211 P21266 B2R983 Q2MJK0 B4DHN0 P11388 Q07812 Q8WWH8 P10620 Q6LCB0 B1PL87 Q02880 P43246 H6TXS1 O14880 P52701 B6CGU5 A0A0S2Z3D2 P09488 O15431 H0Y818 F8VNZ0 P46439 P42574 Q16772 A3E0Z5 P31749 P31751 Q99735 A8K987 P04626 B3KRK7 B2R9R2 K9J972 Q9BXH1 P42338 P27986 A8K1E1 B4DLX6	over	0.515064	0.6254	0.025
map00970	Aminoacyl-tRNA biosynthesis	1	111	40	6210	0.900901	0.644122	H0UI22	P54577 P14868 P54136 P49588 B2RDX5 P07814 P23381 P41250 P47897 O43776 Q9Y2Z4 B2RCM2 A8K492 Q15046 M0QWZ7 Q9BR63 Q9Y285 Q0VGA5 A0A0A0MSX9 A8K067 P12081 P26640 Q9NSE4 O43716 A8K4A8 B3KPX5 B2R7G6 Q5JTZ9 Q15031 H3BTB7 U3KQG0 A2RTX5 Q9HA77 Q96DP5 B2RBJ8 H0UI22 B2RDZ1 B4DVV7 O95363 Q7L3T8	over	0.515064	0.6254	0.025
map04310	Wnt signaling pathway	1	111	40	6210	0.900901	0.644122	Q09472	B5BUB1 Q9HB71 E5RJR5 B7Z475 B4DL06 P63000 P61586 P67870 P19784 E7EU96 P48729 Q13363 O75116 P17612 P49841 D6R938 A0A0C4DGX4 P56545 O75487 I3L425 P22694 Q5SWX3 Q01970 B3KRV2 B4DDW4 B5BUB8 Q9P119 B4E236 P62877 E9PPX2 Q5F2F8 B4E2D6 P05771 A0A169TED2 B7Z3W6 O75084 Q9HCK8 O75197 Q09472 A8K6X5	over	0.515064	0.6254	0.025
map04922	Glucagon signaling pathway	1	111	40	6210	0.900901	0.644122	Q09472	P14618 A0A024R5Z9 P18669 P00338 Q59GM9 P11216 E9PKG1 B2RDW0 P07195 P50416 P11177 Q16822 Q6IB91 P08559 B0AZR9 F8VYY9 P17612 Q13131 A0A024R0Y2 D6R938 A8K6K7 B3KVN0 P22694 B4DVP2 B4DRW6 H3BTA2 A0A024R6M2 Q5SWX3 Q01970 Q14573 P31749 P31751 Q5MIZ7 E9PK47 H0YDQ8 Q96EB6 Q5F2F8 A6NIT2 Q14571 Q09472	over	0.515064	0.6254	0.025
map04914	Progesterone-mediated oocyte maturation	1	111	40	6210	0.900901	0.644122	B2R841	A0A024QZP7 P08238 P07900 B4DHN0 A0A024RB10 A0A024RAV5 P51812 B2R841 P17612 B4DFY5 Q13257 E9PGT3 B3KMP2 B5BTY5 P08754 Q5T8C6 P22694 P14635 B4E0K5 Q9Y6D9 Q8NHZ8 P31749 D7RF68 P31751 Q9UJX2 B5BUB8 P10398 B4DL80 Q9UJX6 Q9H1A4 P20248 B3KN47 F5H0F9 A0JLU2 P42338 P30307 P27986 Q0IJ49 O43306 B4DLX6	over	0.515064	0.6254	0.025
map05203	Viral carcinogenesis	2	111	96	6210	1.8018	1.54589	B6CGU5 Q09472	P62258 P14618 A0A024R5Z9 P63104 P27348 O43707 A0A024QZP7 Q04917 P06899 A8K9J7 P31946 P62805 B4DUQ1 A0A0D9SFB3 P62191 P61981 Q9Y277 P12814 Q2MJK0 B3KR50 P60953 B4DHN0 A0A024RB10 Q96A08 P43487 A0A0S4XQV4 P63000 P61586 B2R5U1 B4E299 Q16531 Q07812 A0A024RAV5 Q9UH60 B5BTZ6 Q93009 B5BU61 Q00403 A0A024R6E3 Q05086 P29084 P17612 B7ZKK7 Q9Y676 Q00534 Q2TAM5 B6CGU5 B7Z992 A8YQF4 B2R7M1 A0A0G2JHJ2 P01111 F5G…	over	0.515376	0.6254	0.0208333
map05034	Alcoholism	1	111	42	6210	0.900901	0.676329	Q5TEC6	P06899 A8K9J7 Q9UBI6 P62805 O75367 B2RDW0 Q9UPN1 P62136 Q96KK5 B2R5B6 B3KR50 B4DJ75 B4DHN0 Q96A08 B2R6Y1 Q5TEC6 P62879 B2R6K4 Q9UD71 A0A024RAV5 P0C0S5 B5BU61 B0AZR9 P16104 B4DFY5 P63218 Q9P0M6 O14929 P01111 P08754 B3KUJ5 O15379 P21397 B7Z242 D7RF68 P10398 B4DL02 B3KNA1 B7Z8I2 F5GZ00 Q6AZW6 B4DJ05	over	0.532357	0.638828	0.0238095
map04066	HIF-1 signaling pathway	1	111	43	6210	0.900901	0.692432	Q09472	E5RHG8 P06733 P04406 Q2TSD0 P02786 B4DHN0 P62753 P09104 B8ZZU8 P11177 E9PB90 B3KT70 Q9UH60 B5BTZ6 P06730 P08559 B4DFY5 Q2TAM5 P36507 D6R938 B4DG62 B3KVN0 C9JEL3 B4DDM0 E7BSV0 Q5SWX3 Q5T2B5 Q9UBS0 P31749 P31751 P19838 P42345 P04626 A6NGV6 P62877 P05771 P42338 P27986 P19174 A0A169TED2 B7Z3W6 Q09472 B4DLX6	over	0.540773	0.641796	0.0232558
map04666	Fc gamma R-mediated phagocytosis	1	111	46	6210	0.900901	0.740741	P52735	G3V1A4 O15511 A0A0S2Z4N8 A0A0S2Z4I9 A0A0S2Z4I7 P62330 P60953 B4DHN0 Q13153 P63000 O15144 Q9BPX5 P59998 B2R4D5 P46109 Q9Y281 B4DFY5 P46108 B7Z6Y2 B7Z992 P29966 O00401 P49006 O15143 B4DDM0 Q9Y6W5 Q53GB6 B4DQ79 Q9UBS0 P31749 P31751 A0A0A0MTP6 Q05655 K7ENH4 Q53RT9 A6PW57 P05771 P42338 P27986 P19174 B7Z905 Q69YP8 P52735 A0A169TED2 B7Z3W6 B4DLX6	over	0.56513	0.663413	0.0217391
map04722	Neurotrophin signaling pathway	1	111	47	6210	0.900901	0.756844	A8KAQ3	P62258 B2RDW0 B3KR50 P62834 P60953 B4DHN0 P63000 P61586 Q07812 A0A024RAV5 J3KTF8 P51812 P46109 B4DFY5 P46108 I3L1A4 Q2TAM5 P36507 P49841 E9PGT3 D6R938 P01111 B5BTY5 Q06124 B4E0K5 Q5SWX3 P49137 P31749 D7RF68 P31751 P19838 B5BUB8 Q05655 B4DL02 H7C2I6 B3KRB7 A8KAQ3 Q9ULH0 P42338 P27986 P19174 Q8TEN0 A0A024QZC2 B4DJ05 O75582 B4DLX6 Q13233	over	0.572961	0.665374	0.0212766
map04152	AMPK signaling pathway	1	111	51	6210	0.900901	0.821256	O00767	P61026 Q15907 P61019 X6RFL8 P13639 P67775 B4DDF7 Q01813 P61006 Q9Y376 P49327 P50416 Q15717 Q16822 Q6IB91 P08237 A8K005 F8VYY9 Q13131 A0A024R0Y2 P17858 A8K6K7 P30154 B4DY91 Q59EF0 Q96L51 Q86XZ2 B4DVP2 B4DDM0 Q9UBS0 P31749 P31751 P63151 P42345 H0YDQ8 J3QS66 Q96EB6 Q96B36 P20248 Q15172 Q96RG4 A0A087X1B8 O00767 Q8N122 F5GZ00 P42338 P27986 A8KA27 X5D7Q2 O00418 B4DLX6	over	0.602912	0.686327	0.0196078
map04919	Thyroid hormone signaling pathway	1	111	52	6210	0.900901	0.837359	Q09472	B4E335 P05023 B4DHN0 B4DL06 P05026 A0A024RAV5 A8K005 B5BU61 P17612 B4DFY5 P36507 P49841 P54709 P01111 B4DY91 P42224 B3KVN0 B3KUJ5 P12931 P22694 A5YM53 B3KW93 Q96ST3 Q01970 O15379 P31749 P31751 Q06310 B4DPP5 Q13733 Q8N3E9 P42345 Q5T911 B2RAH2 Q15648 E9PKQ4 B4E0S3 B9TWZ6 A8KAK5 A0A088AWL3 P05771 P42338 P27986 P19174 A0A169TED2 B7Z3W6 A0A024R637 X5D7Q2 Q09472 B4DLX6 B4DYT5 B4DYQ3	over	0.610068	0.686327	0.0192308
map04360	Axon guidance	1	111	52	6210	0.900901	0.837359	P08581	G3V1A4 Q59GB4 Q13177 P60953 B4DHN0 Q13153 P63000 P61586 A0A024RAV5 P08581 Q9Y281 O75116 P05556 P49841 D6R938 B3KSG3 P01111 P29317 P08754 P12931 P52799 Q06124 P10301 Q00535 Q5SWX3 Q13418 O15031 A0A0U1RQV4 Q53SW3 A8K2B4 Q9BYG5 A8K724 Q5F2F8 Q8TE77 Q96L35 F5GZI3 B4DGW2 Q59GN8 B4DTL8 Q9NPR2 Q53TG4 B3KUN5 Q9NQU5 P42338 P27986 P19174 A0A169TED2 Q5T0V2 B4DE20 G5EA48 Q96T04 B4DLX6	over	0.610068	0.686327	0.0192308
map04062	Chemokine signaling pathway	1	111	54	6210	0.900901	0.869565	P52735	Q9UBI6 B3KR50 P62834 P60953 B4DHN0 Q13153 P63000 P61586 P62879 B2R6K4 A0A024RAV5 B5BTZ6 P46109 O75116 P17612 B4DFY5 P46108 I3L1A4 P63218 Q2TAM5 P49841 O00401 P01111 P42224 P08754 P12931 P22694 A8K103 D3DWY0 B2RBL9 Q68D16 Q01970 B4DQ79 P31749 B3KVL0 D7RF68 P31751 P25098 P19838 A0A0U1RQV4 Q05655 B4DL02 F5GZI3 Q59GN8 B3KRB7 B3KUN5 Q59GT1 P05771 P42338 P27986 P52735 B4DJ05 O43306 B4DLX6	over	0.624	0.687674	0.0185185
map04114	Oocyte meiosis	1	111	54	6210	0.900901	0.869565	B2R841	P62258 P63104 P27348 A0A024QZP7 Q04917 P31946 P67775 B2RDW0 P61981 Q9UPN1 B4DDF7 P62136 E5RJR5 B4DJ75 B4DHN0 A0A024RB10 B0AZQ4 Q9H2G2 Q14683 P51812 B2R841 P17612 B4DFY5 Q13257 E9PGT3 D6R938 B3KMP2 P30154 A0A0C4DGX4 Q59EF0 Q96L51 Q5T8C6 P22694 Q86XZ2 Q8NHZ8 Q5SWX3 Q14573 Q12834 Q9UJX2 B4DL80 Q9UJX6 Q9H1A4 Q5QPD4 H3BRX7 P62877 Q5F2F8 Q15172 B3KN47 F5H0F9 A0JLU2 P30307 Q0IJ49 Q14571 O43306	over	0.624	0.687674	0.0185185
map03013	RNA transport	2	111	125	6210	1.8018	2.01288	Q6IAM0 Q9Y6A5	H3BPC4 P05198 P61326 Q9Y3F4 P20042 P55010 Q14232 A8K7F6 Q14240 Q9BRP8 O15372 P68104 P41091 Q13347 A8K897 P62826 Q13838 P78346 P38919 P41567 A0A024R7L5 B4DV79 B4DMT5 O00422 B2RBR9 J9R021 H0Y3P2 P46060 K7ESH8 E7EUU4 P60228 O75822 A0A076L8Z0 Q6IQ30 B4DEP6 A0A0F7L0Q8 Q9Y5S9 O14980 E9PB61 P78406 Q9UKX7 P06730 A8K3Z5 Q05639 B2RDD7 Q9NR50 P12270 A8KA19 Q7L576 Q6IAM0 P49792 Q86W42 E9PMI6 P47813 A0A087WUT…	under	0.659355	0.719296	0.016
map04015	Rap1 signaling pathway	1	111	65	6210	0.900901	1.0467	P08581	P07737 C9J0J7 B4E335 B2RDW0 A0A0S2Z4N8 A0A0S2Z4I9 A0A0S2Z4I7 P62834 Q96FS1 P60953 B4DHN0 B4DL06 P63000 P61586 Q9Y490 P46734 P11234 A0A024RAV5 P11233 P08581 B0AZR9 P46109 B4DFY5 P46108 B5BU16 P36507 P05556 P01111 P29317 B5BTY5 P08754 P12931 B4E0K5 D3XNU5 B2RBL9 P10301 E7BSV0 Q01970 P31749 D7RF68 P31751 A8MQ02 Q9BYG5 P07996 F2Z357 B2RCZ4 F5GZI3 Q9Y4G6 B3KUN5 P05771 Q9BZL6 P42338 P27986 P19174 D6W5N…	under	0.692255	0.746177	0.0153846
map04145	Phagosome	1	111	66	6210	0.900901	1.0628	B4DT46	P51149 B4E335 P51148 Q53G71 P07437 P20339 P68366 P02786 Q13885 Q9BVA1 P04350 P27824 P38606 Q53GA7 P61020 Q16864 A0A0S4XQV4 P63000 P21283 O75396 P60468 Q14204 P36543 P21281 Q15836 O75348 O15400 B4DP54 Q3ZCM7 Q9Y6G9 O43237 Q6LEU0 P05556 P20645 Q9NY65 A8YQF4 P25774 G3V2S6 B2R7M1 D6RF48 P60059 N1NSB5 G3V126 B4DPZ3 M0R308 P17301 A5YM53 B4E1E2 P27449 Q15075 B3KRY3 B3KR70 A6NHL2 Q9HBQ7 Q6QWC0 P61619 B4D…	under	0.697814	0.746177	0.0151515
map04210	Apoptosis	1	111	68	6210	0.900901	1.09501	B6CGU5	B4E335 C9JFR7 P02545 Q13813 P05198 P20700 P68366 Q03252 Q53GA7 Q502X2 B4DHN0 P09874 O95831 Q07812 A0A1B0GW44 A0A024RAV5 A0A024R5A3 B4DJQ8 O00273 Q6LCB0 B1PL87 B4DFY5 B4DL49 Q2TAM5 P36507 B6CGU5 A0A0S2Z3D2 Q9NY65 P25774 A0A0S2Z3I0 P55212 P01111 Q9UKK3 Q59EF6 F8VNZ0 D3DWY0 Q59FG7 P42574 Q14573 A3E0Z5 P31749 B7Z588 Q5U000 P31751 A6NHL2 Q9HBQ7 P19838 B5BUB8 B3KRK7 O43521 B2R9R2 G3V167 Q07820 Q13546 Q…	under	0.708635	0.748556	0.0147059
map04014	Ras signaling pathway	1	111	69	6210	0.900901	1.11111	P08581	P51148 Q9UBI6 P20339 B2RDW0 Q13177 B3KR50 P62834 P61020 P62330 P60953 B4DHN0 Q13153 P63000 P61586 P62879 B2R6K4 P11234 A0A024RAV5 P11233 P08581 E9PK85 P17612 B4DFY5 P63218 Q2TAM5 P36507 A0A0S2Z3D2 P01111 P29317 P22694 Q06124 D3DWY0 P10301 E7BSV0 B4DN44 Q13043 P31749 Q9UHD2 B4DWS8 P31751 P19838 B5BUB8 A8MQ02 H0Y6T3 B4E1P2 B4DDN9 A8K724 B3KPN7 B4DL02 B3KRB7 H0Y465 B4DTL8 Q59GT1 Q59E87 Q9NQU5 P05771…	under	0.713901	0.748556	0.0144928
map04144	Endocytosis	2	111	145	6210	1.8018	2.33494	A0A024R7S3 P08581	P51149 P61026 Q15907 P51148 P11142 B1AK87 O15511 P20339 P47755 P0DMV9 Q4W4Y1 P02786 P61204 Q00610 P33176 P61006 P61020 P62330 P60953 A0A0S4XQV4 Q9UK41 P61586 Q9BY43 P52907 O15144 Q3SYF1 A0A087WY71 Q9H444 Q9BPX5 Q03135 Q9UBQ0 Q59GU6 B3KML1 P59998 A8K885 H0UID5 A8K4G7 F5H157 A8K5S3 P08581 B2R4D5 P51636 P50570 Q9UN37 Q9UQD4 Q96QK1 Q9NR46 P34931 O60493 Q8TF74 O95782 P54652 P09496 O75436 P53680 Q9BRG1…	under	0.737429	0.759957	0.0137931
map04120	Ubiquitin mediated proteolysis	1	111	74	6210	0.900901	1.19163	B2R4U3	E5RHG8 H3BPC4 P68036 P61081 P61088 E5RJR5 B4DIZ2 P22314 Q9UBE0 B2RBP3 Q16531 Q9UMS4 Q9UBT2 B8ZZU8 Q13619 G3XAG7 B2R4U3 Q05086 P60604 Q53S54 H6TXS1 A0AVT1 Q92466 K7EPJ1 K4DI93 B3KMP2 Q96LR5 H3BUD0 A0A0C4DGX4 Q14139 Q5T8C6 B4DL66 Q9C0C9 A0A024R9U8 B4DUF8 Q8NHZ8 Q5T2B5 A0A0A0MQU3 Q7Z7E8 B4DHK6 Q15386 Q14669 H3BT57 O95155 Q12834 Q9UJX2 Q96J02 A0A0D9SG71 A0A024QZN8 Q6PIA0 B2R9R2 B4DL80 Q96PU5 Q9UJX6 Q…	under	0.738847	0.759957	0.0135135
map05205	Proteoglycans in cancer	1	111	91	6210	0.900901	1.46538	P08581	B4E335 B2R6J2 O75369 J3KTA4 Q9UPN1 P62136 Q14247 B3KR50 B4DJ75 H0YD13 P46940 P60953 B4DHN0 P21333 B4DL06 Q13153 P63000 P62753 P61586 P35241 Q03135 B4DEP6 A0A024RAV5 P08581 P51636 B5BTZ6 E9PK85 Q92888 O75116 P17612 B4DFY5 P36507 P05556 D6R938 P01111 B5BTY5 P12931 P22694 P17301 A5YM53 F8VNT9 Q06124 B4E0K5 P35052 B4DDM0 P42574 P10301 E7BSV0 P31431 Q5SWX3 Q14573 P18827 Q9UBS0 P31749 B3KVL0 D7RF68 P31…	under	0.808602	0.823859	0.010989
map05169	Epstein-Barr virus infection	1	111	112	6210	0.900901	1.80354	Q09472	P62258 P63104 P62195 P27348 A0A024QZP7 Q04917 A0A024R201 P11142 P31946 R4GNH3 B3KNN7 P35998 P0DMV9 P62191 P61981 O00231 Q15008 P62333 C9JLU1 H0YD13 O00232 Q99460 P62826 A0A024RB10 A0A0S4XQV4 Q13200 P67870 Q5U0B3 P19784 B2R5U1 A0A087WVZ9 P43686 Q9Y2S0 B4E299 E7EU96 Q5VWC4 P04792 P46734 O14980 Q9UH60 B5BTZ6 Q93009 P62875 B5BU61 Q00403 A0A024R6E3 P34931 P29084 B7Z377 P54652 P17612 B8ZZQ6 I3L1A4 B7ZK…	under	0.869774	0.869774	0.00892857
map04141	Protein processing in endoplasmic reticulum	1	111	112	6210	0.900901	1.80354	A0A0S2Z5K6	P07237 A7BI36 P13667 P11142 P08238 Q53G71 Q07065 P55072 P11021 B3KQT9 P07900 P05198 P0DMV9 P51572 P30040 P04843 A0A024RDQ0 F5GXX5 Q9Y4L1 Q5CAQ5 E5RJR5 B3KM36 P27824 P25685 Q15084 Q86UY0 P49257 B2RE46 Q9NR31 P60468 P31689 Q13217 Q96HE7 Q9UBS4 Q9UNZ2 Q53FE8 A0A024R7F1 Q07812 R9WWI7 O60884 Q14697 O95757 A0A024R5A3 B4DWN1 Q9NZL4 Q9NYU2 B4DZF1 P34931 P51571 Q53F37 P54652 Q8TAT6 B3KNI2 B7ZKK7 Q9HCU5 P6…	under	0.869774	0.869774	0.00892857
